1     **NHR-49/PPAR- $\alpha$  and HLH-30/TFEB promote *C. elegans* host defense**  
2                     **via a flavin-containing monooxygenase**

3

4

5

6

7     Khursheed A. Wani<sup>1</sup>, Debanjan Goswamy<sup>1</sup>, Stefan Taubert<sup>2</sup>, Ramesh Ratnappan<sup>3</sup>,

8     Arjumand Ghazi<sup>3</sup>, and Javier E. Irazoqui<sup>1\*</sup>

9

10

11

12     Affiliations:

13     <sup>1</sup>Department of Microbiology and Physiological Systems, UMass Medical School,

14     Worcester, MA, USA

15     <sup>2</sup>Department of Medical Genetics, University of British Columbia, Vancouver, BC,

16     Canada

17     <sup>3</sup>Departments of Pediatrics, Developmental Biology, Cell Biology and Physiology,

18     University of Pittsburgh School of Medicine, Pittsburgh, PA, USA

19

20

21

22     \*correspondence: [javier.irazoqui@umassmed.edu](mailto:javier.irazoqui@umassmed.edu)

## 23 **SUMMARY**

24           During bacterial infection, the host is confronted with multiple overlapping signals  
25 that are integrated at the organismal level to produce defensive host responses. How  
26 multiple infection signals are sensed by the host and how they elicit the transcription of  
27 host defense genes is much less understood at the whole-animal level than at the  
28 cellular level. The model organism *Caenorhabditis elegans* is known to mount  
29 transcriptional defense responses against intestinal bacterial infections that elicit  
30 overlapping starvation and infection responses, but the regulation of such responses is  
31 not well understood. Direct comparison of *C. elegans* that were starved or infected with  
32 *Staphylococcus aureus* revealed a large infection-specific transcriptional signature. This  
33 signature was almost completely abrogated by deletion of transcription factor *hlh-*  
34 *30/TFEB*, except for six genes including a flavin-containing monooxygenase (FMO)  
35 gene, *fmo-2/FMO5*. Deletion of *fmo-2/FMO5* severely compromised infection survival,  
36 thus identifying the first FMO with innate immunity functions in animals. Moreover, the  
37 mechanism of *fmo-2/FMO5* induction required the nuclear hormone receptor, NHR-  
38 49/PPAR- $\alpha$ , which induced *fmo-2/FMO5* and host defense cell non-autonomously.  
39 These findings for the first time reveal an infection-specific host response to *S. aureus*,  
40 identify HLH-30/TFEB as its main regulator, reveal that FMOs are important innate  
41 immunity effectors in animals, and identify the mechanism of FMO regulation through  
42 NHR-49/PPAR- $\alpha$  in *C. elegans*, with important implications for innate host defense in  
43 higher organisms.

44

45 Keywords: *Caenorhabditis elegans*, *Staphylococcus aureus*, *fmo-2*, *hlh-30*, *nhr-49*, host  
46 response, infection, innate immunity, TFEB, PPAR- $\alpha$ , FMO5

## 47 INTRODUCTION

48 In their natural habitat, *C. elegans* feed on microbes that grow on rotting  
49 vegetable matter, and thus face a high likelihood of ingesting pathogens (Schulenburg  
50 and Felix, 2017). To defend against infection, *C. elegans* possess innate host defense  
51 mechanisms that promote their survival (Ermolaeva and Schumacher, 2014; Kim and  
52 Ewbank, 2018). In the laboratory, model human pathogenic bacteria cause intestinal  
53 pathology and death through poorly understood mechanisms (Irazoqui et al., 2010a).  
54 Infected animals experience both chemical signals that reveal the pathogen's presence  
55 and organismal stress caused by the infection. Over the last 15 years, several studies  
56 have identified and characterized *C. elegans* gene expression changes in response to  
57 pathogenic bacteria, fungi, and viruses, mounted through evolutionarily conserved  
58 mechanisms (Irazoqui et al., 2010b; Kim and Ewbank, 2018). However, the relative  
59 contributions of pathogen sensing and organismal stress mechanisms to the total  
60 pathogen-induced response remain unclear.

61  
62 We previously showed that ingested Gram-positive bacterium *Staphylococcus*  
63 *aureus* causes drastic cytopathology in *C. elegans* (Irazoqui et al., 2010a). Infection with  
64 *S. aureus* results in progressive effacement and lysis of intestinal epithelial cells, whole-  
65 body cellular breakdown, and death (Irazoqui et al., 2010a). Therefore, *S. aureus*-  
66 infected *C. elegans* experience dietary changes from its laboratory food of  
67 nonpathogenic *E. coli*, as well as intestinal destruction, cellular stress, and putative  
68 molecular signals produced by the pathogen.

69           In previous work, we showed that *C. elegans* mount a pathogen-specific  
70 transcriptional host response against *S. aureus*, which includes genes that encode  
71 antimicrobial proteins (*e.g.* lysozymes, antimicrobial peptides, and secreted C-type  
72 lectins) and cytoprotective factors (*e.g.* autophagy genes, lysosomal factors, and  
73 chaperones) that are necessary and sufficient for survival (Irazoqui et al., 2010a).  
74 However, the relative contributions of organismal stress and pathogen detection to the  
75 induction of the overall host defense response are unknown.

76  
77           We recently discovered that the induction of a large majority of the transcriptional  
78 host response to *S. aureus* requires HLH-30, the *C. elegans* homolog of mammalian  
79 transcription factor EB (TFEB) (Visvikis et al., 2014). TFEB belongs to the MiT family of  
80 transcription factors, which in mammals and *C. elegans* controls the transcription of  
81 autophagy and lysosomal genes in response to nutritional stress in addition to infection  
82 (Lapierre et al., 2013; Raben and Puertollano, 2016). HLH-30 and TFEB also regulate  
83 lipid store mobilization during nutritional deprivation (O'Rourke and Ruvkun, 2013;  
84 Settembre et al., 2013). Thus, HLH-30/TFEB could potentially integrate organismal  
85 stress, metabolism, and pathogen recognition to elicit coordinated host responses to  
86 infection. How HLH-30/TFEB integrates this information to produce stress-specific  
87 responses and what other factors are involved in such specificity are poorly understood.  
88 Specifically, the genes that are induced during infection independently of nutritional  
89 stress are not known.

90

91           Here we report that *S. aureus* infection in *C. elegans* elicits a transcriptional  
92 response that is distinct from that induced by nutritional deprivation, thus defining an  
93 infection-specific transcriptional signature. Both the starvation response and the  
94 infection-specific signature were largely dependent on HLH-30/TFEB, highlighting its  
95 key role as a transcriptional integrator of organismal stress during infection. Moreover,  
96 we identified six genes that were specifically induced during infection even in the  
97 absence of HLH-30/TFEB, potentially revealing an alternative transcriptional host  
98 response signaling pathway. The induction of one of the six genes, *fmo-2/FMO5*, was  
99 entirely and non cell-autonomously dependent on transcription factor NHR-49/PPAR- $\alpha$   
100 (Van Gilst et al., 2005), suggesting that NHR-49/PPAR- $\alpha$  defines a novel host infection  
101 defense pathway. Moreover, functional characterization of *fmo-2/FMO5* suggested that  
102 its enzymatic activity is specifically required for host defense against *S. aureus*,  
103 revealing that FMO-2/FMO5 is a key host defense effector. In addition to identifying a  
104 new transcriptional regulator of the host defense response, this is the first report that  
105 shows that flavin-containing monooxygenases such as FMO-2/FMO5 are important for  
106 host defense in animals.

107

## 108 **RESULTS**

### 109 **Starvation and infection trigger distinct transcriptional responses**

110           Our prior studies showed that *S. aureus* infection of *C. elegans* causes a robust  
111 host transcriptional response that results in the upregulation of 825 genes (Irazoqui et  
112 al., 2010a). It is likely that this transcriptional response to infection is compounded with  
113 nutritional stress, due to nutritional differences between laboratory food nonpathogenic

114 *E. coli* and *S. aureus*, and due to intestinal destruction caused by the pathogen  
115 (Irazoqui et al., 2010a). To identify genes that are induced during infection  
116 independently of nutritional stress, we used whole-animal RNA-seq to directly compare  
117 infected and starved animals (**Fig. 1A**). We identified 388 genes that were differentially  
118 expressed between these two conditions (**Fig. 1B, C, Table S1**). About 70% (283  
119 genes) of differentially expressed genes were upregulated by starvation, while about  
120 30% (105 genes) were upregulated by infection (**Table S1**). Gene ontology analysis  
121 showed the starvation-induced genes to belong mostly to metabolic processes, whereas  
122 the infection-specific signature was highly enriched for innate immune response genes  
123 (**Table S2**). RT-qPCR of the 13 most highly infection-induced genes relative to animals  
124 that were starved or fed nonpathogenic *E. coli* laboratory food confirmed their *S.*  
125 *aureus*-specific induction (**Fig. 1D, Fig. S1A**). Thus, we identified an infection-specific  
126 signature of genes that excludes expression changes that are caused by starvation,  
127 indicating that the host responses to nutritional deprivation and *S. aureus* infection have  
128 distinct and specific features.

129

### 130 **HLH-30/TFEB is critical for host responses to starvation and infection**

131 HLH-30/TFEB was shown to be important for gene induction during dietary  
132 challenge and during infection (O'Rourke and Ruvkun, 2013; Settembre et al., 2013;  
133 Visvikis et al., 2014). However, whether HLH-30/TFEB regulates the infection-specific  
134 response was not known. To assess the relevance of HLH-30/TFEB to the infection-  
135 specific signature, we compared starved and infected *hlh-30/TFEB* loss of function  
136 mutants by RNA-seq. To our surprise, in *hlh-30/TFEB* mutants differential gene

137 expression between starvation and infection was almost completely abrogated (**Fig. 2A**,  
138 **Table S3**). Of the 105 genes in the infection-specific signature, only 6 were induced in  
139 *hlh-30/TFEB* mutants (**Fig. 2B**), including *clec-52*, *fmo-2/FMO5*, and the  
140 uncharacterized genes *C33A12.19*, *C54F6.12*, *K08C7.4*, and *Y47H9C.1* (**Table S3**).  
141 RT-qPCR confirmed the predicted results for the selected 13 top induced genes (**Fig.**  
142 **2C, Figure S1B**). Particularly, we verified that *fmo-2/FMO5* was partially induced in *hlh-*  
143 *30/TFEB* mutants compared to wild type. Partial induction of *fmo-2/FMO5* in *hlh-*  
144 *30/TFEB* mutants was rescued by transgenic re-expression of *hlh-30/TFEB* driven by its  
145 endogenous promoter (**Fig. 2D**). Altogether, these results showed that HLH-30/TFEB is  
146 crucial for both the starvation and the infection-specific responses, and hinted at an  
147 HLH-30/TFEB-independent pathway for the induction of 6 infection-specific genes.

148

#### 149 **Infection induces *fmo-2/FMO5* via NHR-49/PPAR- $\alpha$**

150 As the most highly induced infection-specific gene in *hlh-30/TFEB* mutants (**Fig.**  
151 **2A, Table S3**), *fmo-2/FMO5* attracted our attention. Our prior studies showed that  
152 infection causes *fmo-2/FMO5* induction independently of previously identified host  
153 defense pathways, including p38 MAPK, TGF- $\beta$ , ERK, insulin, Wnt, and HIF-1 pathways  
154 (Irazoqui et al., 2008, 2010a; Luhachack et al., 2012; Visvikis et al., 2014). Additionally,  
155 we found that *fmo-2/FMO5* can be partially induced independently of HLH-30/TFEB  
156 (**Fig. 2** and (Visvikis et al., 2014)). Therefore, additional transcriptional regulators must  
157 be involved in *fmo-2/FMO5* induction.

158



159 Previous studies identified NHR-49, a nuclear receptor homologous to human  
160 PPAR- $\alpha$  and HNF4- $\alpha$ , as essential for *fmo-2/FMO5* induction during exogenous  
161 oxidative stress (Goh et al., 2018; Hu et al., 2018). To examine the role of NHR-  
162 49/PPAR- $\alpha$  during infection, we checked *fmo-2/FMO5* expression in *nhr-49/PPARA* null  
163 mutants (Liu et al., 1999; Van Gilst et al., 2005). We found that in *nhr-49/PPARA* null  
164 mutants, expression of the *fmo-2/FMO5* fluorescent transcriptional reporter was  
165 decreased both under normal conditions (**Fig. 3E**) and, importantly, was barely induced  
166 by *S. aureus* in the intestinal epithelium (**Fig. 3F**). In contrast, *fmo-2/FMO5* induction by  
167 *S. aureus* was partially dependent on *hlh-30/TFEB*, as predicted by RNA-seq (**Fig. 3A-**  
168 **D, Fig. 2**); in *hlh-30/TFEB* mutants expression was preserved in the pharyngeal  
169 isthmus, pharyngeal-intestinal valve, nervous system, coelomocytes, and posterior  
170 intestinal epithelium (**Fig. 3D**). Thus, we found that HLH-30/TFEB appears to contribute  
171 to *fmo-2/FMO5* transcription in the intestinal epithelium, while *nhr-49/PPARA* appears to  
172 be more important in other tissues. By RT-qPCR, noninfected *nhr-49/PPARA* mutants  
173 exhibited about 10-fold lower *fmo-2/FMO5* expression than wild type (**Fig. 3G**). After  
174 infection, *nhr-49/PPARA* mutants completely failed to induce *fmo-2/FMO5* (**Fig. 3G**).  
175 Moreover, transgenic rescue of *nhr-49/PPARA* driven by its endogenous promoter  
176 partially restored *fmo-2/FMO5* induction (**Fig. 3G**). RT-qPCR of the other five HLH-30-  
177 independent genes showed that *K08C7.4* induction was also dependent on NHR-  
178 49/PPAR- $\alpha$  (**Fig. S2C**). These data suggested that NHR-49/PPAR- $\alpha$  contributes to the  
179 induction of some of the HLH-30-independent host defense genes, but the biological  
180 significance of NHR-49/PPAR- $\alpha$  to host defense was not clear.  
181

182 **NHR-49/PPAR- $\alpha$  is required for host defense**

183           Compared to wild type, null *nhr-49/PPARA* mutants showed defective survival of  
184 *S. aureus* infection (**Fig. 4A**) and shorter lifespan when fed nonpathogenic *E. coli* (**Fig.**  
185 **4B**), as previously reported (Van Gilst et al., 2005). These results suggested that NHR-  
186 49/PPAR- $\alpha$  may have important roles in both host defense and aging. Transgenic  
187 rescue of *nhr-49/PPARA* driven by its endogenous promoter completely rescued the  
188 infection survival defect (**Fig. 4A**) but only partially restored the total lifespan on *E. coli*  
189 (**Fig. 4B**), suggesting that distinct thresholds of NHR-49/PPAR- $\alpha$  function exist in  
190 infection and aging.

191  
192           Moreover, relative to wild type, two distinct *nhr-49/PPARA* gain-of-function  
193 mutants (Lee et al., 2016; Svensk et al., 2013) showed enhanced infection survival (**Fig.**  
194 **4C**). In contrast, compared to wild type, gain-of-function mutant *nhr-49(et7)* (gf1)  
195 exhibited prolonged lifespan on *E. coli*, while *nhr-49(et8)* (gf2) exhibited shortened  
196 lifespan (**Fig. 4D**), consistent with previous results (Lee et al., 2016). These results  
197 show that NHR-49/PPAR- $\alpha$  promotes host infection survival, while its function in aging  
198 may be more complex.

199  
200           In line with previous results (Lee et al., 2016), RT-qPCR of noninfected animals  
201 showed constitutively elevated *fmo-2/FMO5* expression in gain-of-function *nhr-*  
202 *49/PPARA* mutants relative to wild type, consistent with the observed pro-survival  
203 function of NHR-49/PPAR- $\alpha$  (**Fig. 4E**). Upon infection, both gain-of-function mutants  
204 exhibited further *fmo-2/FMO5* induction, reaching higher *fmo-2/FMO5* expression than

205 wild type controls (**Fig. 4E**). Consistently, on nonpathogenic *E. coli nhr-49/PPARA* gain-  
206 of-function mutants exhibited constitutively high *fmo-2/FMO5* reporter GFP expression  
207 in the anterior pharynx, pharyngeal isthmus, nervous system, and the anterior intestinal  
208 epithelium (**Fig. 4F, H**). Infection further increased reporter expression throughout the  
209 body in *nhr-49/PPARA* gain-of-function mutants, becoming much stronger than wild  
210 type animals (**Fig. 4G, I**). These results suggested that *nhr-49/PPARA* activation is  
211 sufficient for *fmo-2/FMO5* expression in a spatially restricted pattern, and confirmed that  
212 infection synergistically upregulates *fmo-2/FMO5* expression throughout the entire body.  
213 Interestingly, the pattern of *fmo-2/FMO5* expression in noninfected *nhr-49/PPARA* gain-  
214 of-function mutants (**Fig. 4H**) resembled that observed in infected *hlh-30/TFEB* null  
215 mutants (**Fig. 3D**), suggesting that *nhr-49/PPARA* may drive *fmo-2/FMO5* expression in  
216 the pharynx, nervous system, and anterior intestine, while *hlh-30/TFEB* may do so in  
217 the intestine, muscle, and epidermis. Therefore, HLH-30/TFEB and NHR-49/PPAR- $\alpha$   
218 may have complementary roles for the spatial pattern of *fmo-2/FMO5* expression.

219

## 220 **NHR-49/PPAR- $\alpha$ functions in multiple tissues for host defense**

221 *nhr-49/PPARA* is expressed in multiple tissues (Ratnappan et al., 2014). To  
222 identify specific tissues where *nhr-49/PPARA* is sufficient for host defense, we  
223 reintroduced wild type *nhr-49/PPARA* into *nhr-49/PPARA* mutants driven by tissue-  
224 specific promoters, including intestine, neurons, muscle, and epidermis (*i.e.*  
225 hypodermis). We examined these rescue lines for *fmo-2/FMO5* induction and survival of  
226 infection. Intestinal rescue of *nhr-49/PPARA* fully restored both basal and induced *fmo-*  
227 *2/FMO5* expression (**Fig. 5A**). Re-expression of *nhr-49/PPARA* partially restored *fmo-*

228 2/*FMO5* induction in other lines (**Fig. 5D, G, J**). Consistently, expression in each of  
229 these tissues also rescued the infection survival defect of *nhr-49/PPARA* mutants. In  
230 fact, intestinal, neuronal, and muscular expression produced enhanced infection  
231 survival compared to wild type (**Fig. 5B, E, H**), while epidermal expression rescued  
232 infection survival to a level similar to wild type (**Fig. 5K**). These results suggested that  
233 *nhr-49/PPARA* can function from any one of these tissues to promote host defense  
234 against infection.

235

236 In contrast, tissue-specific complementation of *nhr-49/PPARA* had more complex  
237 effects on normal lifespan on nonpathogenic *E. coli*. Intestinal and epidermal expression  
238 not only rescued *nhr-49/PPARA* mutant lifespan but also prolonged it compared to wild  
239 type (**Fig. 5C, L**). Neuronal expression rescued lifespan to wild type level (**Fig. 5F**), and  
240 muscle expression caused partial rescue (**Fig. 5I**). Together, these data suggest that  
241 *nhr-49/PPARA* may play distinct and tissue-specific roles for infection survival and  
242 lifespan.

243

#### 244 **NHR-49/PPAR- $\alpha$ controls a fraction of the infection-specific transcriptional** 245 **signature**

246 To better understand the biological relevance of *nhr-49/PPARA* to the infection-  
247 specific host response, we compared the transcriptomes of starved and infected *nhr*-  
248 *49/PPARA* mutants. In stark contrast to *hlh-30/TFEB* mutants, which showed a much-  
249 reduced differential response compared to wild type (**Fig. 2**), *nhr-49/PPARA* mutants  
250 exhibited many more differentially expressed genes than wild type between these two

251 conditions (e.g. 313 v. 135 upregulated, **Fig. S3** and **Table S4**). Moreover, 92 (68%) of  
252 the 135 infection-upregulated genes in wild type were also upregulated in *nhr-*  
253 *49/PPARA* mutants, and categorized as NHR-49/PPAR- $\alpha$ -independent (**Fig. S3C** and  
254 **Table S4**). Examples of these genes included lysozymes *ilys-2*, *ilys-3*, and *lys-3*, and  
255 infection response gene *irg-6* (Troemel et al., 2006).

256

257         Additionally, 43 genes were induced by infection in wild type but not in *nhr-*  
258 *49/PPARA* mutants, and thus categorized as NHR-49-dependent (**Fig. S3C** and **Table**  
259 **S4**). Examples included C-type lectin *cllec-60*, lysozyme *lys-5*, and, importantly, *fmo-*  
260 *2/FMO5* and *K08C7.4*, two of the six HLH-30/TFEB-independent (**Fig. S3C, Table S3**  
261 **Fig. 2**) and NHR-49/PPAR- $\alpha$ -dependent genes (**Fig. 3** and **Fig. S2**). In contrast, 221  
262 genes were induced by infection only in *nhr-49/PPARA* mutants. These included  
263 important host defense transcription factors, such as *cebp-1/CEBP* and *pha-4/FOXA1*,  
264 infection response genes *irg-2* and *irg-5*, and C-type lectins *cllec-70* and *cllec-71* (Bolz et  
265 al., 2010; Estes et al., 2010; Irazoqui et al., 2008, 2010a; Pukkila-Worley et al., 2012).  
266 Thus, it appeared that *nhr-49/PPARA* loss may be compensated by a large infection-  
267 specific response that does not normally occur in wild type animals. However, loss of  
268 *nhr-49/PPARA* abrogated the induction of less than one-third of the wild type infection-  
269 specific signature, suggesting that *nhr-49/PPARA* makes its important contribution to  
270 host defense through the induction of relatively fewer genes than *hlh-30/TFEB*.

271

272 **HLH-30/TFEB genetically functions downstream of NHR-49/PPAR- $\alpha$  for host**  
273 **defense**

274           During infection, *nhr-49/PPARA* expression did not change in wild type animals  
275 compared to uninfected controls (**Fig. 6A**). Moreover, *nhr-49/PPARA* expression was  
276 similar in noninfected wild type and *hlh-30/TFEB* mutants. In contrast, in infected *hlh-*  
277 *30/TFEB* mutants compared with wild type, *nhr-49/PPARA* expression was lower (**Fig.**  
278 **6A**), indicating that HLH-30/TFEB contributes to *nhr-49/PPARA* expression during  
279 infection. Conversely, in *nhr-49/PPARA* null mutants *hlh-30/TFEB* baseline expression  
280 was higher than in wild type, yet its induction by infection was abrogated (**Fig. 6B**). This  
281 indicated that *nhr-49/PPARA* is required for increased expression of *hlh-30/TFEB* during  
282 infection. Moreover, in *nhr-49/PPARA* gain-of-function mutants compared to wild type,  
283 both *hlh-30/TFEB* baseline expression and induction were higher (**Fig. 6B**). Considered  
284 together, these data suggested that HLH-30/TFEB and NHR-49/PPAR- $\alpha$  contribute to  
285 each other's expression in noninfected and infected animals in different ways.

286

287           Because *hlh-30/TFEB* and *nhr-49/PPARA* contributed to both infection-specific  
288 *fmo-2/FMO5* induction (**Fig. 2, Fig. 3**) and each other's expression (**Fig. 6A, B**), we  
289 examined their genetic interactions. To determine whether *hlh-30/TFEB* and *nhr-*  
290 *49/PPARA* genetically function in the same pathway, we attempted to generate  
291 *hlh-30(-); nhr-49(-)* double mutants, but were unable to obtain them from genetic  
292 crosses suggesting synthetic lethality, consistent with a previous report (Goh et al.,  
293 2018). However, it was possible to construct *nhr-49/PPARA* (gain-of-function); *hlh-*  
294 *30/TFEB* (loss-of-function) double mutants. Remarkably, neither *nhr-49(gf1)* nor *nhr-*  
295 *49(gf2)*, the two mutations that caused enhanced infection survival (**Fig. 4C**), rescued  
296 the diminished infection survival of *hlh-30/TFEB* mutants (**Fig. 6C**). In contrast, lifespan

297 on nonpathogenic *E. coli* was increased in both cases, as compared to *hlh-30/TFEB*  
298 single mutants (**Fig. 6D**). These data showed that during infection *hlh-30/TFEB* is  
299 epistatic to *nhr-49/PPARA*, suggesting that *hlh-30/TFEB* genetically functions  
300 downstream of *nhr-49/PPARA* for infection survival, as suggested by *hlh-30/TFEB*  
301 expression in *nhr-49/PPARA* mutants (**Fig. 6B**). For longevity, the effect of *nhr-*  
302 *49/PPARA* gain of function and *hlh-30/TFEB* loss of function was additive, suggesting  
303 that they regulate aging in parallel genetic pathways.

304  
305 Expression of *fmo-2/FMO5* mirrored these genetic interactions (**Fig. 6E**). In  
306 noninfected animals, incorporation of *hlh-30* (loss of function) mildly affected the high  
307 constitutive expression of *fmo-2/FMO5* in *nhr-49/PPARA* (gain of function) mutants (**Fig.**  
308 **6E**). In contrast, infected *nhr-49/PPARA* (gain of function); *hlh-30/TFEB* (loss of  
309 function) double mutants exhibited the *hlh-30/TFEB* (loss of function) phenotype, *i.e.*  
310 decreased *fmo-2/FMO5* expression compared to *nhr-49/PPARA* (gain of function, gf1  
311 and gf2) (**Fig. 6E**). Thus, *hlh-30/TFEB* was epistatic to *nhr-49/PPARA* for *fmo-2/FMO5*  
312 expression during infection, consistent with it acting downstream or parallel to *nhr-*  
313 *49/PPARA* for infection survival.

314

### 315 **FMO-2/FMO5 is required for host survival of infection**

316 So far, we focused on *fmo-2/FMO5* as a useful reporter of the host response, but  
317 its biological relevance to infection survival was unclear. FMO-2 and FMO5 belong to  
318 the evolutionarily-conserved flavin-containing monooxygenase (FMO) protein family  
319 (Huijbers et al., 2014). In mammals, FMO proteins are primarily known to function in the

320 detoxification of foreign substances (xenobiotics) with prominent roles in drug  
321 metabolism (Krueger and Williams, 2005). *C. elegans* FMO-2 exhibits homology to  
322 human proteins FMO1-5, with closest similarity to FMO5 (42% identity). Previously,  
323 FMO-2/FMO5 had been implicated in dietary-restriction-mediated lifespan extension,  
324 and its forced expression resulted in stress resistance (Leiser et al., 2015). In plants,  
325 FMOs participate in host defense against bacterial and fungal infections (Bartsch et al.,  
326 2006; Koch et al., 2006). Whether animal FMOs also function in innate host defense  
327 was not known.

328

329 To determine the physiological relevance of *fmo-2/FMO5* during infection, we  
330 examined mutants homozygous for a deletion in *fmo-2/FMO5* predicted to result in a  
331 null allele (*C. elegans* Deletion Mutant Consortium, 2012). Compared with wild type,  
332 *fmo-2/FMO5* mutants exhibited greatly compromised survival of *S. aureus* infection  
333 (**Fig. 7A**) but did not exhibit differences in survival of *P. aeruginosa* infection or in aging  
334 when fed nonpathogenic *E. coli* (**Fig. 7B-C**). Deletion of *fmo-2/FMO5* did not affect the  
335 induction of the 9 most highly induced infection-specific signature genes (**Fig. S4**).  
336 These data suggested that FMO-2/FMO5 may play an important role for host defense  
337 specifically during *S. aureus* infection, which is independent of the induction of many  
338 other host defense genes.

339

340 To determine whether such a role of FMO-2/FMO5 requires its catalytic activity,  
341 we used CRISPR-mediated genome editing to modify key conserved residues in the  
342 FMO-2/FMO5 FAD-binding domain, the NADPH-binding domain, or both (**Fig. S5A-B**).



343 Due to their conservation in FMOs from yeast, plants, and animals (**Fig. S5B**), these  
344 residues are predicted to be required for electron transfer from organic substrates to  
345 cofactors FAD and NADPH (Kubo et al., 1997; Rescigno and Perham, 1994).  
346 Remarkably, mutation of the NADPH binding site caused a severe infection survival  
347 defect, while mutation of the FAD binding site caused a somewhat milder phenotype  
348 (**Fig. 7D**). Mutation of both binding sites produced an additive defect (**Fig. 7D**). These  
349 results suggested that both cofactor binding sites were required for FMO-2/FMO5  
350 function in host defense. In contrast, none of these mutations, alone or in combination,  
351 altered total lifespan on nonpathogenic *E. coli* (**Fig. 7E**). Together, these data indicated  
352 that FMO-2/FMO5 catalytic activity may be specifically required for host defense against  
353 infection.

354  
355 Simultaneous deletion of *nhr-49/PPARA* and *fmo-2/FMO5* resulted in an infection  
356 survival phenotype that was similar to those of the single mutants (**Fig. S6A**),  
357 suggesting that *nhr-49/PPARA* and *fmo-2/FMO5* function in the same genetic pathway.  
358 However, the *nhr-49/PPARA* mutant lifespan defect was epistatic to the lack of effect of  
359 *fmo-2/FMO5* mutation (**Fig. S6B**), suggesting that *nhr-49/PPARA* may regulate aging  
360 independently of *fmo-2/FMO5*.

361  
362 As mentioned, *fmo-2/FMO5* transcript was induced several thousand-fold in *S.*  
363 *aureus*-infected animals relative to nonpathogenic *E. coli* controls (**Fig. 7F**). In contrast,  
364 animals infected with Gram-negative pathogenic bacterium *Pseudomonas aeruginosa*  
365 exhibited no significant change (**Fig. 7F**), consistent with previous results (Irazoqui et

366 al., 2008, 2010a; Wong et al., 2007). The fluorescent *in vivo fmo-2/FMO5* transcriptional  
367 reporter showed faint GFP expression, mostly in the anterior intestine and head of  
368 noninfected animals (**Fig. 7G**). Starvation modestly increased GFP expression in the  
369 intestine and nervous system (**Fig. 7H**), while *P. aeruginosa* repressed it below the  
370 levels observed in noninfected animals (**Fig. 7I**). In stark contrast, *S. aureus* caused  
371 high GFP induction in all tissues, except in gonads and eggs (**Fig. 7J**). These  
372 observations confirmed that *fmo-2/FMO5* is strongly induced in a pathogen-specific  
373 manner.

374

375       Moreover, we found that intestinal-restricted *fmo-2/FMO5* overexpression was  
376 sufficient to boost infection survival (**Fig. S7A**). Interestingly, the lifespan of these  
377 animals was also extended on nonpathogenic *E. coli* (**Fig. S7B**) in accordance with  
378 previous reports (Leiser et al., 2015). These results suggested that elevating FMO-  
379 2/FMO5 levels in the intestine alone confers benefits not only in host defense but also  
380 against aging, possibly by increasing host resistance to food *E. coli* pathogenesis late in  
381 life (McGee et al., 2011; Zhao et al., 2017). Altogether, these observations suggested  
382 that *fmo-2/FMO5* is necessary and sufficient for host defense against *S. aureus*.

383

## 384 **DISCUSSION**

385       Because bacteria serve as nutritional source for *C. elegans*, and because  
386 intestinal infections cause destruction of the epithelium resulting in loss of nutrient  
387 absorption, transcriptional responses to nutritional challenges are likely intertwined with  
388 the transcriptional host defense response to the pathogen itself. This raises the question

389 of whether *C. elegans* senses infection as a stress *per se*, through its physiological  
390 consequences in the organism, or a combination of both. Here, by directly comparing  
391 transcriptomes of animals that were infected with *S. aureus* or were starved, we  
392 discovered that starvation and infection elicit large and distinct transcriptional  
393 signatures. This indicates that the *C. elegans* host response to *S. aureus* infection is not  
394 entirely the result of starvation, and enables the dissection of infection-specific and  
395 starvation-specific host response regulatory modules as shown here.

396

397 In the present study, we found that loss of HLH-30/TFEB almost completely  
398 abrogated differential gene expression between starvation and infection – implicating  
399 HLH-30/TFEB not just in a hypothetical overlapping response but in each of these two  
400 distinct signatures. This strongly suggests that HLH-30/TFEB integrates metabolic and  
401 other stresses to contribute to stress-specific transcriptional responses. The molecular  
402 mechanisms that enable a single transcription factor to mediate specific transcriptional  
403 responses to distinct stresses may involve stress-specific signals or transcriptional co-  
404 factors.

405

406 By focusing on *fmo-2/FMO5*, which is highly and specifically induced by infection  
407 and is only partially dependent on HLH-30/TFEB, we discovered a novel role for the  
408 nuclear receptor NHR-49/PPAR- $\alpha$  in host defense against infection. NHR-49/PPAR- $\alpha$  is  
409 better known in *C. elegans* as a transcription factor that is important for the response to  
410 starvation (Van Gilst et al., 2005). However, recently NHR-49/PPAR- $\alpha$  was shown to  
411 mediate the defense response to exogenous oxidative stress (Goh et al., 2018; Hu et

412 al., 2018). Thus, NHR-49/PPAR- $\alpha$  participates in host defense against biotic and abiotic  
413 stressors, and should be considered a key player in the organismal stress response  
414 alongside SKN-1/NRF, DAF-16/FOXO3, and HLH-30/TFEB (Blackwell et al., 2015; Lin  
415 et al., 2018; Tissenbaum, 2018). Our analysis showed that NHR-49/PPAR- $\alpha$  is not  
416 required for as large a portion of the host response to infection as HLH-30/TFEB, even  
417 though NHR-49/PPAR- $\alpha$  is partially required for HLH-30/TFEB induction. The larger  
418 HLH-30/TFEB regulon implies that during infection signals in addition to NHR-49/PPAR-  
419  $\alpha$  activation contribute to HLH-30/TFEB regulation. Similar to HLH-30/TFEB, how NHR-  
420 49/PPAR- $\alpha$  induces specific responses to distinct stresses is also unknown. These  
421 findings are relevant beyond nematodes, as PPAR- $\alpha$  regulates TFEB in mammalian  
422 cells (Kim et al., 2017). Moreover, the microbiota represses HNF4- $\alpha$ , a second NHR-49  
423 homolog, in zebrafish and mice, to maintain intestinal homeostasis (Davison et al.,  
424 2017). Therefore, unraveling the control of NHR-49/PPAR- $\alpha$  in relation to intestinal  
425 microbiota and infection may provide useful information to understand vertebrate  
426 intestinal homeostasis and host defense.

427

428 In addition to leading us to discover NHR-49/PPAR- $\alpha$ , FMO-2/FMO5 is  
429 interesting in its own right. Regulation of *fmo-2/FMO5* is complex. During infection,  
430 NHR-49/PPAR- $\alpha$  appeared to drive *fmo-2/FMO5* expression in the pharynx, nervous  
431 system, and anterior intestine, while *hlh-30/TFEB* induced it in the intestine, muscle,  
432 and epidermis in complementary spatial patterns. Hypoxia and dietary restriction induce  
433 *fmo-2/FMO5* (Leiser et al., 2015; Shen et al., 2005), and so do gain of function  
434 mutations in *hif-1/HIF1* or *skn-1/NRF2* (Leiser et al., 2015; Nhan et al., 2019). Lifespan

435 extension by dietary restriction or *hif-1/HIF1* gain of function requires *fmo-2/FMO5*;  
436 moreover, *hlh-30/TFEB* loss of function quenches lifespan extension by *hif-1/HIF1* and  
437 *fmo-2/FMO5* induction by hypoxia and fasting (Leiser et al., 2015). These observations  
438 lend further support to our findings that HLH-30/TFEB partially induces *fmo-2/FMO5*  
439 during infection.

440

441 In addition, we found that loss of FMO-2/FMO5 causes a severe defect in  
442 infection survival without affecting longevity. Thus, FMO-2/FMO5 represents a novel  
443 host defense effector. We previously examined the requirement for *fmo-2/FMO5* using  
444 RNAi-mediated silencing, but such manipulation failed to produce a phenotype for  
445 reasons unknown (Irazoqui et al., 2010a). Moreover, the failure of tissue-specific RNAi  
446 to elicit a phenotype and the toxicity of *fmo-2/FMO5* extrachromosomal transgenic  
447 constructs precluded our investigation of the tissues of *fmo-2/FMO5* action for host  
448 defense. However, single copy intestinal expression of FMO-2/FMO5 boosted host  
449 defense, suggesting that FMO-2/FMO5 could play a major role in the intestine, a hub for  
450 host defense in *C. elegans* (McGhee, 2007). Nonetheless, FMO-2/FMO5 induction  
451 appears to be a major mechanism of host defense in *C. elegans*. Exactly how FMO-  
452 2/FMO5 promotes host infection survival is poorly understood, but site-directed  
453 mutagenesis of the NADPH and FAD binding sites revealed that the mechanism of  
454 action requires its catalytic activity. In addition, human FMO5 can generate large  
455 amounts of H<sub>2</sub>O<sub>2</sub> from O<sub>2</sub> (Fiorentini et al., 2016). Thus, it is possible that FMO-2/FMO5  
456 is an infection-specific NADPH oxidase that generates H<sub>2</sub>O<sub>2</sub> with antimicrobial and  
457 signaling functions (McCallum and Garsin, 2016; Sies and Jones, 2020). The observed

458 roles of *fmo-2/FMO5* in survival of heat, di-thiothreitol, and tunicamycin stress are  
459 consistent with a H<sub>2</sub>O<sub>2</sub>-mediated signaling role (Leiser et al., 2015).

460

461 FMOs are emerging as important host defense factors across phylogeny. In  
462 plants, FMO1 is required for the catalysis of pipecolic acid to N-hydroxypipecolic acid,  
463 which provides systemic acquired resistance to bacterial and oomycete infections  
464 (Hartmann et al., 2018). In mammals, FMO3 is an evolutionarily ancient FMO that  
465 exhibits unique substrate specificity and catalyzes multiple drugs that is important for  
466 their detoxification (Krueger and Williams, 2005). However, to date no reports have  
467 indicated an important role for FMO5, or other FMOs, in mammalian (or any animal)  
468 innate immunity. In mice, FMO5 is expressed in many tissues and organs, including the  
469 liver and the epithelium of the gastrointestinal tract (Scott et al., 2017). Mouse FMO5 is  
470 required for sensing the microbiota, and *Fmo5*<sup>-/-</sup> mutants exhibit altered metabolic  
471 profiles and microbiomes compared with wild type mice (Scott et al., 2017).  
472 Furthermore, *Fmo5*<sup>-/-</sup> mutants exhibit a 70% reduction in plasma TNF- $\alpha$  compared with  
473 wild type (Scott et al., 2017). Together, these observations suggest that FMO5 is an  
474 important microbiota sensor and effector that modulates the intestinal microbiota, but  
475 the mechanism of action is unknown. Therefore, elucidation of mechanisms of host  
476 defense mediated by *fmo-2* in nematodes and *FMO5* in mammals will provide  
477 fundamental insight into evolutionarily conserved mechanisms of host defense against  
478 infection and identify therapeutic opportunities for infections and inflammatory diseases.

479

480 **ACKNOWLEDGEMENTS**

481 The authors are grateful to members of the Irazoqui laboratory, the Program in Innate  
482 Immunity, and the Department of Microbiology and Physiological Systems for helpful  
483 insights and discussions. Joyce Barrett, Linda Benson, Richard Fish, Amy Parker,  
484 Cheryl Barry, and Tammy Bailey provided expert facilities and administrative  
485 assistance. Scott F. Leiser (University of Michigan) provided KAE11 strain. Some  
486 strains used in this study were provided by the *Caenorhabditis* Genetics Center, which  
487 is funded by the NIH Office of Research Infrastructure Programs (P40-OD010440).  
488 Research reported in this publication was supported by the National Institute of General  
489 Medical Sciences of the National Institutes of Health under award number GM101056,  
490 and by the National Science Foundation under award number NSF1457055 (to J.E.I.),  
491 and by a grant from the National Institutes of Aging (R01AG051659) to A.G. The  
492 content is solely the responsibility of the authors and does not necessarily represent the  
493 official views of the National Institutes of Health.

494

#### 495 **AUTHOR CONTRIBUTIONS**

496 K.A.W. and J.E.I. conceived and designed the experiments. K.A.W. and J.E.I. analyzed  
497 the data. K.A.W. and D.G. performed the experiments. S.T., R.R., and A.G. provided  
498 reagents and essential intellectual input. All authors participated in manuscript writing  
499 and editing.

500

501 **MATERIALS AND METHODS**

502 **KEY RESORCES TABLE**

| REAGENT or RESOURCE                                                                                    | SOURCE                    | IDENTIFIER |
|--------------------------------------------------------------------------------------------------------|---------------------------|------------|
| <b>Bacterial Strains</b>                                                                               |                           |            |
| <i>Escherichia coli</i> Str <sup>R</sup>                                                               | Gary Ruvkun               | OP50-1     |
| <i>Staphylococcus aureus</i>                                                                           | Irazoqui laboratory       | SH1000     |
| <i>Pseudomonas aeruginosa</i>                                                                          | Irazoqui laboratory       | PA14       |
| <b><i>C. elegans</i> strains</b>                                                                       |                           |            |
| Wild type, Bristol isolate                                                                             | CGC                       | N2         |
| <i>fmo-2(ok2147)</i> IV                                                                                | CGC                       | JIN2140    |
| <i>eavEx20[Pfmo-2::nls-gfp + rol-6(su1006)]</i>                                                        | Goh et al; 2018           | VE40       |
| <i>nhr-49(nr2041)</i> I; <i>eavEx20[Pfmo-2::nls-gfp + rol-6(su1006)]</i>                               | this work                 | JIN2150    |
| <i>nhr-49(et8)</i> I; <i>eavEx20[Pfmo-2::nls-gfp + rol-6(su1006)]</i>                                  | this work                 | JIN2151    |
| <i>hlh-30(tm1978)</i> IV; <i>eavEx20[Pfmo-2::nls-gfp + rol-6(su1006)]</i>                              | this work                 | JIN2152    |
| <i>seaSi180[(pCFJ150)(Pvha-6::fmo-2 + H2B::gfp) + Cbr-unc-119(+)]</i> II                               | gift from Scott F. Leiser | KAE11      |
| <i>fmo-2(FAD)</i> IV                                                                                   | this work                 | JIN2146    |
| <i>fmo-2(NADPH)</i> IV                                                                                 | this work                 | JIN2147    |
| <i>fmo-2(FAD+NADPH)</i> IV                                                                             | this work                 | JIN2148    |
| <i>nhr-49(nr2041)</i> I                                                                                | CGC                       | JIN2149    |
| <i>nhr-49(et7)</i> I                                                                                   | CGC                       | STE108     |
| <i>nhr-49(et8)</i> I                                                                                   | CGC                       | STE109     |
| <i>nhr-49(nr2041)</i> I; <i>fmo-2(ok2147)</i> IV                                                       | this work                 | JIN2145    |
| <i>hlh-30(tm1978)</i> IV                                                                               | Irazoqui laboratory       | JIN1375    |
| <i>hlh-30(tm1978)</i> IV; <i>jnl10[P<sub>hlh-30</sub>::hlh-30::gfp; rol-6(su1006)]</i>                 | Irazoqui laboratory       | JIN1698    |
| <i>nhr-49(et7)</i> I; <i>hlh-30(tm1978)</i> IV                                                         | this work                 | JIN2143    |
| <i>nhr-49(et8)</i> I; <i>hlh-30(tm1978)</i> IV                                                         | this work                 | JIN2144    |
| <i>nhr-49(nr2041)</i> I; <i>glmEx5[P<sub>nhr-49</sub>::nhr-49::gfp + P<sub>myo-2</sub>::mCherry]</i>   | this work                 | JIN2142    |
| <i>nhr-49(nr2041)</i> I; <i>glmEx13[P<sub>prgef-1</sub>::nhr-49::gfp + P<sub>myo-2</sub>::mCherry]</i> | this work                 | AGP51      |
| <i>nhr-49(nr2041)</i> I; <i>glmEx11[P<sub>col-12</sub>::nhr-49::gfp + P<sub>myo-2</sub>::mCherry]</i>  | this work                 | AGP53      |
| <i>nhr-49(nr2041)</i> I; <i>glmEx8[P<sub>myo-3</sub>::nhr-49::gfp + P<sub>myo-2</sub>::mCherry]</i>    | this work                 | AGP63      |



|                                                                                                                                                                                             |           |       |
|---------------------------------------------------------------------------------------------------------------------------------------------------------------------------------------------|-----------|-------|
| <i>nhr-49</i> (nr2041) l; glmEx9[Pgly-19:: <i>nhr-49::gfp</i> + P <i>myo-2::mCherry</i> ]                                                                                                   | this work | AGP65 |
| <b>Oligonucleotides</b>                                                                                                                                                                     |           |       |
| <i>fmo-2</i> (FAD) crRNA1=<br>5' AACAAAGCGTGTGCTGTCAT 3'<br><i>fmo-2</i> (FAD) crRNA2=<br>5' GTCATAGGAGCTGGTGCTTC 3'                                                                        | IDT       | N/A   |
| <i>fmo-2</i> (FAD) repair template=<br>5' cgtgtttgtgtcaaaATGGGGAACAAGCG<br>TGTTGCTGTCATcGcAGCTGcTGCTTCc<br>GcATTACCGTCGATTcGgttgaattctgatttt<br>tattgaaataatag 3'                           | IDT       | N/A   |
| <i>fmo-2</i> (NADPH) crRNA1=<br>5' TCACAAGGGTTATGAAGACA 3'<br><i>fmo-2</i> (NADPH) crRNA2=<br>5' TCACGATTACAAGGATCACA 3'                                                                    | IDT       | N/A   |
| <i>fmo-2</i> (NADPH) repair template=<br>5' CAAAGGACGTATTGTTTCATTCTCAC<br>GATTACAAGGAcCAtAAaGGTTATGAA<br>GAtAAaGTAGTTGTTGTCGTTGcAATTG<br>cAAATAGTGGAATCGACGTGGCAGTT<br>GAGCAATCAAGAATTGC 3' | IDT       | N/A   |
| <i>snb-1</i> RT-PCR/F=<br>5' GAATCATGAAGGTGAACGTGG 3'<br><i>snb-1</i> RT-PCR/R=<br>5' GAATGACGACGATAGCGCAC 3'                                                                               | IDT       | N/A   |
| <i>fmo-2</i> RT-PCR/F=<br>5' ATAATGAACACGCGTTTCTTC 3'<br><i>fmo-2</i> RT-PCR/R=<br>5' GATGTTTGGCTTGATTCTGA 3'                                                                               | IDT       | N/A   |
| <i>hlh-30</i> RT-PCR/F=<br>5' GAACACATCAGAAGACATGAAAC 3'<br><i>hlh-30</i> RT-PCR/R=<br>5' AAGATGCGATGGCGGGACCT 3'                                                                           | IDT       | N/A   |
| <i>nhr-49</i> RT-PCR/F=<br>5' TCCGAGTTCATTCTCGACG 3'<br><i>nhr-49</i> RT-PCR/R=<br>5' GGATGAATTGCCAATGGAGC 3'                                                                               | IDT       | N/A   |
| <i>lys-5</i> RT-PCR/F=<br>5' GCCAGAGCTGCTGGCCTCAC 3'<br><i>lys-5</i> RT-PCR/R=<br>5' GCCTTTGCTTCACTGACCATTGC 3'                                                                             | IDT       | N/A   |
| <i>clec-60</i> RT-PCR/F=<br>5' CTTTGCTGCAAGTGAAGTGTTC 3'<br><i>clec-60</i> RT-PCR/R=                                                                                                        | IDT       | N/A   |

|                                                                                                                            |     |     |
|----------------------------------------------------------------------------------------------------------------------------|-----|-----|
| 5' GGACATAATCGTGTGGTTGTTTCG 3'                                                                                             |     |     |
| <i>H02F09.3</i> RT-PCR/F=<br>5' CGACAAACACCCCTGATAGC 3'<br><i>H02F09.3</i> RT-PCR/R=<br>5' GTGGTTGTGTGGATGATGAC 3'         | IDT | N/A |
| <i>ech-9</i> RT-PCR/F=<br>5' GAAAGAAAATGACACTGAAATG 3'<br><i>ech-9</i> RT-PCR/R=<br>5' ACCGAGAATAAACATGATATC 3'            | IDT | N/A |
| <i>Y65B4BR.1</i> RT-PCR/F=<br>5' ATCTTTACATGGATGCTCAGCAG 3'<br><i>Y65B4BR.1</i> RT-PCR/R=<br>5' GGCCTAGTTTTGAGAAATGGAAG 3' | IDT | N/A |
| <i>C50F7.5</i> RT-PCR/F=<br>5' CATCCGAAGATCCTCAACCA 3'<br><i>C50F7.5</i> RT-PCR/R=<br>5' TGGAGATGATGATCCAGAAG 3'           | IDT | N/A |
| <i>srr-6</i> RT-PCR/F=<br>5' ATTGCCAGTGGATTCAGCAGT 3'<br><i>srr-6</i> RT-PCR/R=<br>5' GCCTTGAATACTTCTACGTCC 3'             | IDT | N/A |
| <i>Y47H9C.1</i> RT-PCR/F=<br>5' GGACATTTCCCTACTGGAGG 3'<br><i>Y47H9C.1</i> RT-PCR/R=<br>5' GGTGGCCTTTGGTTTACAAAA 3'        | IDT | N/A |
| <i>K08C7.4</i> RT-PCR/F=<br>5' CTCCAGGATCTGACGAAGAGG 3'<br><i>K08C7.4</i> RT-PCR/R=<br>5' CCCTCTGCCTCTTGCCGATG 3'          | IDT | N/A |
| <i>irg-5</i> RT-PCR/F=<br>5' GATGCATCTGCGGTGAAGAAG 3'<br><i>irg-5</i> RT-PCR/R=<br>5' CCAGATAACCATTGTA ACTCGT 3'           | IDT | N/A |
| <i>C33A12.19</i> RT-PCR/F=<br>5' CTGAAAACAAGCGGAAGAAATC 3'<br><i>C33A12.19</i> RT-PCR/R=<br>5' CATGGAGATGCTGTATCATTG 3'    | IDT | N/A |
| <i>clec-52</i> RT-PCR/F=<br>5' ATTCCTTGTTGGTTTTTCAAAG 3'<br><i>clec-52</i> RT-PCR/R=<br>5' ATCAGCAACTAAAGAAGTCCAC 3'       | IDT | N/A |
| <i>pals-39</i> RT-PCR/F=<br>5' GTTTGCTCCGAATTCATAAAACG 3'<br><i>pals-39</i> RT-PCR/R=<br>5' GAGTGATGTCTTGAACGCCA 3'        | IDT | N/A |

|                                                                                                                                                         |                  |          |
|---------------------------------------------------------------------------------------------------------------------------------------------------------|------------------|----------|
| <i>mpk-2</i> RT-PCR/F=<br>5' CGTCGGCTGAAACAATTGATAC 3'<br><i>mpk-2</i> RT-PCR/R=<br>5' GCCAGATAACATAGGTGGAGC 3'                                         | IDT              | N/A      |
| <i>C54F6.12</i> RT-PCR/F=<br>5' GAAAAGGTTTTGACCTGCGTAAAAG<br>3'<br><i>C54F6.12</i> RT-PCR/R=<br>5' GCTCTTTTTGTCCTCAAAGATTTG<br>3'                       | IDT              | N/A      |
| <i>Pmyo-3</i> /F=<br>5' gctagCCTGCAGGAGTGATTATAGTC<br>TCTGTTT 3'<br><i>Pmyo-3</i> /R=<br>5' taagcaGTCGACCATTCTAGATGGA<br>TCTAGT 3'                      | Ghazi laboratory | N/A      |
| <i>Pgly-19</i> /F=<br>5' gctagCCTGCAGGcgaccgccgattgattgg<br>gg 3'<br><i>Pgly-19</i> /R=<br>5' taagcaGTCGACcagaattgagagtctcaatg<br>3'                    | Ghazi laboratory | N/A      |
| <i>Prgef-1</i> /F=<br>5' gctagCCTGCAGGcgcaacattgaattccgac<br>caagagc 3'<br><i>Prgef-1</i> /R=<br>5' taagcaGTCGACCATCGTCGTCGTCG<br>TCGATGCCGTCTTCACGA 3' | Ghazi laboratory | N/A      |
| <i>Pcol-12</i> /F=<br>5' gctagCCTGCAGGtcagtattgctattgac 3'<br><i>Pcol-12</i> /R=<br>5' taagcaGTCGACtttctaaaagtaatcaaat<br>c 3'                          | Ghazi laboratory | N/A      |
| <i>fmo-2(FAD)</i> genotyping/F=<br>5' gccgtgaaagttctgtacatcttg 3'<br><i>fmo-2(FAD)</i> genotyping/R=<br>5' CGCCATCAAAGATTTCTTCCAACG 3'                  | IDT              | NA       |
| <i>fmo-2(NADPH)</i> genotyping/F=<br>5' CACCTCAAGAAAATCTAGCAAATTT<br>C 3'<br><i>fmo-2(NADPH)</i> genotyping/R=<br>5' CCAGTTGACATCACGACCTCGTC 3'         | IDT              | NA       |
| <b>Software and algorithms</b>                                                                                                                          |                  |          |
| Statistical analysis                                                                                                                                    | Prism 8          | GraphPad |

|                                                     |                             |                          |
|-----------------------------------------------------|-----------------------------|--------------------------|
| Protein sequence alignment                          | SnapGene v. 4.3.11          | www.snapgene.com         |
| RNA-seq read alignment and gene count estimation    | Salmon v. 0.13.1            | (Patro et al., 2017)     |
| RNA-seq differential gene expression analysis       | DESeq2 v. 1.22.2            | (Love et al., 2014)      |
| Computation environment                             | Bioconductor 3.8 in RStudio | (Loraine et al., 2015)   |
| Interactive RNA-seq data analysis and visualization | DEBrowser v. 1.10.9         | (Kucukural et al., 2019) |

503

## 504 **Experimental model**

505 The nematode *C. elegans* was used as the experimental model for this study.

506 Strains were maintained at 15 – 20 °C on Nematode Growth Media (NGM) plates

507 seeded with Str<sup>R</sup> *E. coli* OP50-1 strain using standard methods (Stiernagle, 2006).

508

## 509 **Method Details**

510 **Infection assays.** *S. aureus* SH1000 strain was grown overnight in tryptic soy broth

511 (TSB) containing 50 µg/ml kanamycin (KAN). Overnight cultures were diluted 1:1 with

512 TSB and 10 µl of the diluted culture was uniformly spread on the entire surface of 35

513 mm tryptic soy agar (TSA) plates containing 10 µg/ml KAN. Plates were incubated for 5

514 – 6 h at 37 °C, then stored overnight at 4 °C. *P. aeruginosa* isolate PA14 was grown

515 overnight in Luria broth. 10 µl of the overnight culture was uniformly spread on the entire

516 surface of 35 mm NGM plates. Plates were incubated at 37 °C for 24 h followed by 25

517 °C for 48 h (Powell and Ausubel, 2008). Animals were treated with 100 µg/ml 5-fluoro-

518 2'-deoxyuridine (FUDR) at L4 larval stage for ~24 h at 15 °C - 20 °C before transfer

519 to *S. aureus* or *P. aeruginosa* plates. Three plates were assayed for each strain in each

520 replicate, with 20 - 40 animals per plate. Survival was quantified using standard

521 methods (Powell and Ausubel, 2008). Animals that crawled off the plate or died of  
522 bursting vulva were censored. Infection assays were carried out at least twice.

523 ***S. aureus* infection for RNA analysis.** To prepare infection plates, *S. aureus* SH1000  
524 was grown overnight in TSB containing 50 µg/ml KAN. 500 – 1,000 µl of overnight  
525 culture was uniformly spread on the entire surface of freshly prepared 100 mm TSA  
526 plates supplemented with 10 µg/ml KAN. The plates were incubated for 6 h at 37 °C,  
527 then stored overnight at 4 °C. To prepare *P. aeruginosa* plates, *P. aeruginosa* isolate  
528 PA14 was grown overnight in Luria broth. 1 ml of overnight culture was uniformly spread  
529 on the entire surface of freshly prepared 100 mm NGM plates. The plates were first  
530 incubated at 37 °C for 24 h and then at 25 °C for 48 h. To prepare control plates with  
531 nonpathogenic *E. coli*, 1 ml of 10 - 20X concentrated overnight culture of OP50-1  
532 bacteria was spread on 100 mm NGM plates, incubated for 5 – 6 h at 37 °C, and then  
533 stored at 4 °C, similar to *S. aureus* plates. To prepare plates for starvation, TSA plates  
534 were treated similarly to infection plates, except that nothing was added to them.

535 Synchronized young adults of wild type and mutants were seeded the next day on *S.*  
536 *aureus*, *P. aeruginosa*, OP50-1, and starvation plates that were previously warmed to  
537 room temperature. After 4 h incubation at 25 °C, animals for all conditions were washed  
538 3 - 4 times in water, and then lysed in 1 ml of TRIzol reagent (Invitrogen). The samples  
539 were snap frozen in liquid nitrogen, then stored at -80 °C. RNA was extracted using  
540 1-bromo-3-chloropropane (MRC) followed by purification with isopropanol-ethanol  
541 precipitation. RNA was analyzed by qPCR or sequencing. For sequencing, RNA was  
542 additionally purified using PureLink™ RNA Mini Kit (Invitrogen). Four independent

543 biological replicates were submitted to BGI for library preparation and sequencing using  
544 BGI-seq 500.

545

546 **Longevity (aging) assays.** Animals were transferred to 60 mm NGM plates seeded  
547 with 10 - 20X concentrated *E. coli* OP50-1 bacteria supplemented with 100 µg/ml  
548 FUDR. For consistency with infection assays, longevity assays were also performed at  
549 25 °C. Three plates were assayed for each strain in each replicate, with 20 - 40 animals  
550 per plate. Experiments were repeated at least twice. Animals that did not respond to  
551 prodding were scored as dead, and the animals that died from bursting vulva or crawled  
552 off the plate were censored.

553

554 **Quantitative RT-PCR.** After each treatment, *C. elegans* were collected in sterile water  
555 and lysed using TRIzol Reagent (Invitrogen). Total RNA was extracted and purified as  
556 described before and then digested with DNase (Bio-Rad). 100 - 1,000 ng of total RNA  
557 was used for cDNA synthesis using iScript cDNA synthesis kit (Bio-Rad). RT-qPCR was  
558 performed using SYBR Green Supermix (Bio-Rad) using a ViiA7 Real-Time qPCR  
559 system (Applied Biosystems). Primer sequences are provided in **Key Resources**  
560 **Table**. At least two independent biological replicates were used for each treatment and  
561 *C. elegans* strain. qPCR Ct values were normalized to the *snb-1* control gene, which did  
562 not change with the conditions tested, to calculate RT-qPCR  $\Delta$ Ct values. Data analysis  
563 was carried out using the Pfaffl method (Pfaffl, 2001). Heat maps were generated using  
564 open access online tool Morpheus (<https://software.broadinstitute.org/morpheus>).

565

566 **Generation of transgenic strains.** To construct *Pnhr-49::nhr-49::gfp* containing  
567 plasmid, a 6.6 kb genomic fragment of *nhr-49* gene (comprising of 4.4 kb coding region  
568 covering all *nhr-49* transcripts plus 2.2 kb sequence upstream of ATG) was cloned into  
569 the GFP expression vector pPD95.77 (Addgene #1495), as reported previously  
570 (Ratnappan et al., 2014). For generating tissue-specific constructs, the *nhr-49* promoter  
571 was replaced with tissue-specific promoters using *SbfI* and *Sall* restriction enzymes.  
572 The primers that were used to amplify tissue-specific promoters are listed in **Key**  
573 **Resources Table**. For the generation of rescue strains, each rescue plasmid (100  
574 ng/μl) was injected along with pharyngeal muscle-specific *Pmyo-2::mCherry* co-injection  
575 marker (25 ng/μl) into *nhr-49(nr2041)* mutant strain, using standard methods (Mello and  
576 Fire, 1995). Strains were maintained by picking animals that were positive for both GFP  
577 and mCherry.

578  
579 *fmo-2(FAD)*, *fmo-2(NADPH)*, and *fmo-2(FAD+NADPH)* strains were generated  
580 using CRISPR-Cas9 genome editing as described (Dokshin et al., 2018). Residues for  
581 mutation were selected based on protein sequence alignment and as previously  
582 reported (Bartsch et al., 2006). To isolate worms with mutated residue(s) in FAD or  
583 NADPH motifs, silent mutations that resulted in restriction enzyme sites (*PvuII* for FAD,  
584 and *AvaII* for NADPH) without any change in the amino acid(s) were created in the  
585 repair templates. A PCR fragment spanning the mutated nucleotides was amplified from  
586 the progeny of the injected worms, followed by digestion with the above-mentioned  
587 restriction enzymes. Mutations in FAD and NADPH motifs were confirmed by  
588 sequencing PCR fragments amplified from the corresponding regions in the mutant

589 animals. To generate *fmo-2(FAD+NADPH)* double mutant, the *fmo-2(NADPH)* mutant  
590 strain was used as a background for a second round of CRISPR microinjections.  
591 Sequences for crRNAs, repair templates, and the genotyping primers used for the  
592 construction of these strains are listed in **Key Resources Table**.

593

594 **Image analysis.** Images were captured using a Lionheart FX Automatic Microscope  
595 (BioTek Instruments) under a 4X objective. 20 - 30 animals were anesthetized using  
596 100 mM NaN<sub>3</sub> on a 2% agarose pad immediately prior to imaging. Fluorescence  
597 microscopy analysis was independently replicated at least 3 times.

598

599 **RNA sequencing analysis.** BGI provided clean reads in FASTQ format. Clean FASTQ  
600 files were verified using FastQC  
601 (<https://www.bioinformatics.babraham.ac.uk/projects/fastqc>) using Bioconductor in  
602 RStudio (Loraine et al., 2015) and used as input for read mapping in Salmon v.0.9.1  
603 (Patro et al., 2017) using WBCel.235.cdna from Ensembl ([www.ensembl.org](http://www.ensembl.org)) as  
604 reference transcriptome. Salmon outputs in quant format were used for input in DESeq2  
605 (Love et al., 2014) in Bioconductor in RStudio for count per gene estimation using batch  
606 correction. Total counts per gene tables from DESeq2 were used as input for  
607 DEBrowser (Kucukural et al., 2019) for verification of transcriptome replicate similarity,  
608 data analysis using the built-in DESeq2 algorithm for differential gene expression  
609 analysis (adjusted P value  $\leq 0.01$  was considered significant), visualization, and  
610 interactive data mining. Overlap between gene sets was determined using the Venn tool



611 in BioInfoRx (<https://bioinforx.com>). GO representation analysis was performed using  
612 online tool g:Profiler (Raudvere et al., 2019) (<https://biit.cs.ut.ee/gprofiler/gost>).

613

614 **Quantification and statistical analysis.** Prism 8 (GraphPad) was used for statistical  
615 analyses. Survival data were compared using the Log-Rank (Mantel-Cox) test. A P  
616 value  $\leq 0.05$  was considered significantly different from control. For comparisons to a  
617 single reference, two-sample, two-tailed *t* tests were performed to evaluate differences  
618 between  $\Delta\text{Ct}$  values (Schmittgen and Livak, 2008). For multiple comparisons, statistical  
619 significance was examined by one-way ANOVA followed by Sidak's post-hoc test. A P  
620 value  $\leq 0.05$  was considered significant.

## 621 REFERENCES

- 622 Bartsch, M., Gobbato, E., Bednarek, P., Debey, S., Schultze, J.L., Bautor, J., and  
623 Parker, J.E. (2006). Salicylic acid-independent ENHANCED DISEASE  
624 SUSCEPTIBILITY1 signaling in Arabidopsis immunity and cell death is regulated by the  
625 monooxygenase FMO1 and the Nudix hydrolase NUDT7. *Plant Cell* 18, 1038–1051.
- 626 Blackwell, T.K., Steinbaugh, M.J., Hourihan, J.M., Ewald, C.Y., and Isik, M. (2015).  
627 SKN-1/Nrf, stress responses, and aging in *Caenorhabditis elegans*. *Free Radic. Biol.*  
628 *Med.* 88, 290–301.
- 629 Bolz, D.D., Tenor, J.L., and Aballay, A. (2010). A conserved PMK-1/p38 MAPK is  
630 required in *caenorhabditis elegans* tissue-specific immune response to *Yersinia pestis*  
631 infection. *J. Biol. Chem.* 285, 10832–10840.
- 632 *C. elegans* Deletion Mutant Consortium (2012). large-scale screening for targeted  
633 knockouts in the *Caenorhabditis elegans* genome. *G3 Bethesda Md* 2, 1415–1425.
- 634 Davison, J.M., Lickwar, C.R., Song, L., Breton, G., Crawford, G.E., and Rawls, J.F.  
635 (2017). Microbiota regulate intestinal epithelial gene expression by suppressing the  
636 transcription factor Hepatocyte nuclear factor 4 alpha. *Genome Res.* 27, 1195–1206.
- 637 Dokshin, G.A., Ghanta, K.S., Piscopo, K.M., and Mello, C.C. (2018). Robust Genome  
638 Editing with Short Single-Stranded and Long, Partially Single-Stranded DNA Donors in  
639 *Caenorhabditis elegans*. *Genetics* 210, 781–787.
- 640 Ermolaeva, M.A., and Schumacher, B. (2014). Insights from the worm: the *C. elegans*  
641 model for innate immunity. *Semin. Immunol.* 26, 303–309.
- 642 Estes, K.A., Dunbar, T.L., Powell, J.R., Ausubel, F.M., and Troemel, E.R. (2010). bZIP  
643 transcription factor zip-2 mediates an early response to *Pseudomonas aeruginosa*  
644 infection in *Caenorhabditis elegans*. *Proc. Natl. Acad. Sci. U. S. A.* 107, 2153–2158.
- 645 Fiorentini, F., Geier, M., Binda, C., Winkler, M., Faber, K., Hall, M., and Mattevi, A.  
646 (2016). Biocatalytic Characterization of Human FMO5: Unearthing Baeyer-Villiger  
647 Reactions in Humans. *ACS Chem. Biol.* 11, 1039–1048.
- 648 Goh, G.Y.S., Winter, J.J., Bhanshali, F., Doering, K.R.S., Lai, R., Lee, K., Veal, E.A.,  
649 and Taubert, S. (2018). NHR-49/HNF4 integrates regulation of fatty acid metabolism  
650 with a protective transcriptional response to oxidative stress and fasting. *Aging Cell* 17,  
651 e12743.
- 652 Hartmann, M., Zeier, T., Bernsdorff, F., Reichel-Deland, V., Kim, D., Hohmann, M.,  
653 Scholten, N., Schuck, S., Brautigam, A., Holzel, T., et al. (2018). Flavin  
654 Monooxygenase-Generated N-Hydroxypipicolinic Acid Is a Critical Element of Plant  
655 Systemic Immunity. *Cell* 173, 456–469 e16.

- 656 Hu, Q., D'Amora, D.R., MacNeil, L.T., Walhout, A.J.M., and Kubiseski, T.J. (2018). The  
657 *Caenorhabditis elegans* Oxidative Stress Response Requires the NHR-49 Transcription  
658 Factor. *G3 Bethesda* 8, 3857–3863.
- 659 Huijbers, M.M., Montersino, S., Westphal, A.H., Tischler, D., and van Berkel, W.J.  
660 (2014). Flavin dependent monooxygenases. *Arch Biochem Biophys* 544, 2–17.
- 661 Irazoqui, J.E., Ng, A., Xavier, R.J., and Ausubel, F.M. (2008). Role for beta-catenin and  
662 HOX transcription factors in *Caenorhabditis elegans* and mammalian host epithelial-  
663 pathogen interactions. *Proc. Natl. Acad. Sci. U. S. A.* 105, 17469–17474.
- 664 Irazoqui, J.E., Troemel, E.R., Feinbaum, R.L., Luhachack, L.G., Cezairliyan, B.O., and  
665 Ausubel, F.M. (2010a). Distinct pathogenesis and host responses during infection of *C.*  
666 *elegans* by *P. aeruginosa* and *S. aureus*. *PLoS Pathog* 6, e1000982.
- 667 Irazoqui, J.E., Urbach, J.M., and Ausubel, F.M. (2010b). Evolution of host innate  
668 defence: insights from *Caenorhabditis elegans* and primitive invertebrates. *Nat Rev*  
669 *Immunol* 10, 47–58.
- 670 Kim, D.H., and Ewbank, J.J. (2018). Signaling in the innate immune response.  
671 *WormBook* 2018, 1–35.
- 672 Kim, Y.S., Lee, H.M., Kim, J.K., Yang, C.S., Kim, T.S., Jung, M., Jin, H.S., Kim, S.,  
673 Jang, J., Oh, G.T., et al. (2017). PPAR-alpha Activation Mediates Innate Host Defense  
674 through Induction of TFEB and Lipid Catabolism. *J Immunol* 198, 3283–3295.
- 675 Koch, M., Vorwerk, S., Masur, C., Sharifi-Sirchi, G., Olivieri, N., and Schlaich, N.L.  
676 (2006). A role for a flavin-containing mono-oxygenase in resistance against microbial  
677 pathogens in *Arabidopsis*. *Plant J* 47, 629–639.
- 678 Krueger, S.K., and Williams, D.E. (2005). Mammalian flavin-containing  
679 monooxygenases: structure/function, genetic polymorphisms and role in drug  
680 metabolism. *Pharmacol Ther* 106, 357–387.
- 681 Kubo, A., Itoh, S., Itoh, K., and Kamataki, T. (1997). Determination of FAD-binding  
682 domain in flavin-containing monooxygenase 1 (FMO1). *Arch. Biochem. Biophys.* 345,  
683 271–277.
- 684 Kucukural, A., Yukselen, O., Ozata, D.M., Moore, M.J., and Garber, M. (2019).  
685 DEBrowser: interactive differential expression analysis and visualization tool for count  
686 data. *BMC Genomics* 20, 6.
- 687 Lapierre, L.R., De Magalhaes Filho, C.D., McQuary, P.R., Chu, C.C., Visvikis, O.,  
688 Chang, J.T., Gelino, S., Ong, B., Davis, A.E., Irazoqui, J.E., et al. (2013). The TFEB  
689 orthologue HLH-30 regulates autophagy and modulates longevity in *Caenorhabditis*  
690 *elegans*. *Nat Commun* 4, 2267.

- 691 Lee, K., Goh, G.Y., Wong, M.A., Klassen, T.L., and Taubert, S. (2016). Gain-of-Function  
692 Alleles in *Caenorhabditis elegans* Nuclear Hormone Receptor *nhr-49* Are Functionally  
693 Distinct. *PLoS One* *11*, e0162708.
- 694 Leiser, S.F., Miller, H., Rossner, R., Fletcher, M., Leonard, A., Primitivo, M., Rintala, N.,  
695 Ramos, F.J., Miller, D.L., and Kaerberlein, M. (2015). Cell nonautonomous activation of  
696 flavin-containing monooxygenase promotes longevity and health span. *Science* *350*,  
697 1375–1378.
- 698 Lin, X.-X., Sen, I., Janssens, G.E., Zhou, X., Fonslow, B.R., Edgar, D., Stroustrup, N.,  
699 Swoboda, P., Yates, J.R., Ruvkun, G., et al. (2018). DAF-16/FOXO and HLH-30/TFEB  
700 function as combinatorial transcription factors to promote stress resistance and  
701 longevity. *Nat. Commun.* *9*, 4400.
- 702 Liu, L.X., Spoerke, J.M., Mulligan, E.L., Chen, J., Reardon, B., Westlund, B., Sun, L.,  
703 Abel, K., Armstrong, B., Hardiman, G., et al. (1999). High-throughput isolation of  
704 *Caenorhabditis elegans* deletion mutants. *Genome Res.* *9*, 859–867.
- 705 Loraine, A.E., Blakley, I.C., Jagadeesan, S., Harper, J., Miller, G., and Firon, N. (2015).  
706 Analysis and visualization of RNA-Seq expression data using RStudio, Bioconductor,  
707 and Integrated Genome Browser. *Methods Mol. Biol. Clifton NJ* *1284*, 481–501.
- 708 Love, M.I., Huber, W., and Anders, S. (2014). Moderated estimation of fold change and  
709 dispersion for RNA-seq data with DESeq2. *Genome Biol.* *15*, 550.
- 710 Luhachack, L.G., Visvikis, O., Wollenberg, A.C., Lacy-Hulbert, A., Stuart, L.M., and  
711 Irazoqui, J.E. (2012). EGL-9 controls *C. elegans* host defense specificity through prolyl  
712 hydroxylation-dependent and -independent HIF-1 pathways. *PLoS Pathog.* *8*,  
713 e1002798.
- 714 McCallum, K.C., and Garsin, D.A. (2016). The Role of Reactive Oxygen Species in  
715 Modulating the *Caenorhabditis elegans* Immune Response. *PLoS Pathog* *12*,  
716 e1005923.
- 717 McGee, M.D., Weber, D., Day, N., Vitelli, C., Crippen, D., Herndon, L.A., Hall, D.H., and  
718 Melov, S. (2011). Loss of intestinal nuclei and intestinal integrity in aging *C. elegans*.  
719 *Aging Cell* *10*, 699–710.
- 720 McGhee, J.D. (2007). The *C. elegans* intestine. *WormBook* 1–36.
- 721 Mello, C., and Fire, A. (1995). DNA transformation. *Methods Cell Biol.* *48*, 451–482.
- 722 Nhan, J.D., Turner, C.D., Anderson, S.M., Yen, C.-A., Dalton, H.M., Cheesman, H.K.,  
723 Ruter, D.L., Uma Naresh, N., Haynes, C.M., Soukas, A.A., et al. (2019). Redirection of  
724 SKN-1 abates the negative metabolic outcomes of a perceived pathogen infection.  
725 *Proc. Natl. Acad. Sci. U. S. A.* *116*, 22322–22330.

- 726 O'Rourke, E.J., and Ruvkun, G. (2013). MXL-3 and HLH-30 transcriptionally link  
727 lipolysis and autophagy to nutrient availability. *Nat Cell Biol* 15, 668–676.
- 728 Patro, R., Duggal, G., Love, M.I., Irizarry, R.A., and Kingsford, C. (2017). Salmon  
729 provides fast and bias-aware quantification of transcript expression. *Nat. Methods* 14,  
730 417–419.
- 731 Pfaffl, M.W. (2001). A new mathematical model for relative quantification in real-time  
732 RT-PCR. *Nucleic Acids Res.* 29, e45.
- 733 Powell, J.R., and Ausubel, F.M. (2008). Models of *Caenorhabditis elegans* infection by  
734 bacterial and fungal pathogens. *Methods Mol. Biol. Clifton NJ* 415, 403–427.
- 735 Pukkila-Worley, R., Feinbaum, R., Kirienko, N.V., Larkins-Ford, J., Conery, A.L., and  
736 Ausubel, F.M. (2012). Stimulation of host immune defenses by a small molecule  
737 protects *C. elegans* from bacterial infection. *PLoS Genet.* 8, e1002733.
- 738 Raben, N., and Puertollano, R. (2016). TFEB and TFE3: Linking Lysosomes to Cellular  
739 Adaptation to Stress. *Annu Rev Cell Dev Biol* 32, 255–278.
- 740 Ratnappan, R., Amrit, F.R., Chen, S.W., Gill, H., Holden, K., Ward, J., Yamamoto, K.R.,  
741 Olsen, C.P., and Ghazi, A. (2014). Germline signals deploy NHR-49 to modulate fatty-  
742 acid beta-oxidation and desaturation in somatic tissues of *C. elegans*. *PLoS Genet* 10,  
743 e1004829.
- 744 Raudvere, U., Kolberg, L., Kuzmin, I., Arak, T., Adler, P., Peterson, H., and Vilo, J.  
745 (2019). g:Profiler: a web server for functional enrichment analysis and conversions of  
746 gene lists (2019 update). *Nucleic Acids Res.* 47, W191–W198.
- 747 Rescigno, M., and Perham, R.N. (1994). Structure of the NADPH-binding motif of  
748 glutathione reductase: efficiency determined by evolution. *Biochemistry* 33, 5721–5727.
- 749 Schmittgen, T.D., and Livak, K.J. (2008). Analyzing real-time PCR data by the  
750 comparative C(T) method. *Nat. Protoc.* 3, 1101–1108.
- 751 Schulenburg, H., and Felix, M.A. (2017). The Natural Biotic Environment of  
752 *Caenorhabditis elegans*. *Genetics* 206, 55–86.
- 753 Scott, F., Gonzalez Malagon, S.G., O'Brien, B.A., Fennema, D., Veeravalli, S.,  
754 Coveney, C.R., Phillips, I.R., and Shephard, E.A. (2017). Identification of Flavin-  
755 Containing Monooxygenase 5 (FMO5) as a Regulator of Glucose Homeostasis and a  
756 Potential Sensor of Gut Bacteria. *Drug Metab. Dispos. Biol. Fate Chem.* 45, 982–989.
- 757 Settembre, C., De Cegli, R., Mansueto, G., Saha, P.K., Vetrini, F., Visvikis, O., Huynh,  
758 T., Carissimo, A., Palmer, D., Klisch, T.J., et al. (2013). TFEB controls cellular lipid  
759 metabolism through a starvation-induced autoregulatory loop. *Nat Cell Biol* 15, 647–  
760 658.

- 761 Shen, C., Nettleton, D., Jiang, M., Kim, S.K., and Powell-Coffman, J.A. (2005). Roles of  
762 the HIF-1 hypoxia-inducible factor during hypoxia response in *Caenorhabditis elegans*.  
763 *J. Biol. Chem.* 280, 20580–20588.
- 764 Sies, H., and Jones, D.P. (2020). Reactive oxygen species (ROS) as pleiotropic  
765 physiological signalling agents. *Nat. Rev. Mol. Cell Biol.*
- 766 Stiernagle, T. (2006). Maintenance of *C. elegans*. *WormBook Online Rev. C Elegans*  
767 *Biol.* 1–11.
- 768 Svensk, E., Ståhlman, M., Andersson, C.-H., Johansson, M., Borén, J., and Pilon, M.  
769 (2013). PAQR-2 regulates fatty acid desaturation during cold adaptation in *C. elegans*.  
770 *PLoS Genet.* 9, e1003801.
- 771 Tissenbaum, H.A. (2018). DAF-16: FOXO in the Context of *C. elegans*. *Curr. Top. Dev.*  
772 *Biol.* 127, 1–21.
- 773 Troemel, E.R., Chu, S.W., Reinke, V., Lee, S.S., Ausubel, F.M., and Kim, D.H. (2006).  
774 p38 MAPK regulates expression of immune response genes and contributes to  
775 longevity in *C. elegans*. *PLoS Genet* 2, e183.
- 776 Van Gilst, M.R., Hadjivassiliou, H., Jolly, A., and Yamamoto, K.R. (2005). Nuclear  
777 hormone receptor NHR-49 controls fat consumption and fatty acid composition in *C.*  
778 *elegans*. *PLoS Biol* 3, e53.
- 779 Visvikis, O., Ihuegbu, N., Labed, S.A., Luhachack, L.G., Alves, A.F., Wollenberg, A.C.,  
780 Stuart, L.M., Stormo, G.D., and Irazoqui, J.E. (2014). Innate host defense requires  
781 TFEB-mediated transcription of cytoprotective and antimicrobial genes. *Immunity* 40,  
782 896–909.
- 783 Wong, D., Bazopoulou, D., Pujol, N., Tavernarakis, N., and Ewbank, J.J. (2007).  
784 Genome-wide investigation reveals pathogen-specific and shared signatures in the  
785 response of *Caenorhabditis elegans* to infection. *Genome Biol* 8, R194.
- 786 Zhao, Y., Gilliat, A.F., Ziehm, M., Turmaine, M., Wang, H., Ezcurra, M., Yang, C.,  
787 Phillips, G., McBay, D., Zhang, W.B., et al. (2017). Two forms of death in ageing  
788 *Caenorhabditis elegans*. *Nat. Commun.* 8, 15458.
- 789

790 **FIGURE LEGENDS**

791 **Figure 1. Starvation and *S. aureus* infection trigger distinct transcriptional**  
792 **responses.**

793 **(A)** Schematic overview of experimental approach for RNA-seq conditions.

794 Synchronized young adults were subjected to either starvation or infection for 4 h before  
795 RNA extraction.

796 **(B)** Volcano plot of differentially expressed genes ( $P_{\text{adj}} \leq 0.01$ ). Genes that were  
797 induced in each condition relative to the other are indicated in red (for starvation) and  
798 green (for infection). FC, fold change.  $P_{\text{adj}}$ , adjusted P value.

799 **(C)** Heat map of differentially expressed genes [ $\text{Log}_2(\text{FC})$ ] comparing infection with *S.*  
800 *aureus* SH1000 to starvation by RNA-seq. The boxed area represents the designated  
801 infection-specific expression signature.

802 **(D)** Heat map of a set of 13 genes most highly induced by *S. aureus* SH1000 compared  
803 to starvation, whose relative transcript levels were measured by RT-qPCR and plotted  
804 as row-normalized  $\log_2(\text{relative expression})$ , or  $-\Delta\text{Ct}$ . Conditions include nonpathogenic  
805 *E. coli*, *S. aureus* (4 h), and starvation (4 h). Columns represent independent biological  
806 replicates.

807

808 **Figure 2. HLH-30/TFEB is critical for host responses to starvation and infection.**

809 **(A)** Volcano plot of differentially expressed genes in *hlh-30/TFEB* loss of function  
810 mutants ( $P \leq 0.01$ ). Genes that were induced in each condition relative to the other are  
811 indicated in red (for starvation) and green (for infection).

812 **(B)** Venn diagram representing genes that were upregulated during infection compared  
813 to starvation in wild type and *hlh-30/TFEB* mutants. A few selected genes are indicated  
814 for reference.

815 **(C)** Heat map of RT-qPCR ( $-\Delta\text{Ct}$ ) relative expression values of a set of 13 genes most  
816 highly induced by *S. aureus* v starvation in wild type, measured in wild type and *hlh-*  
817 *30/TFEB* mutants. Conditions include nonpathogenic *E. coli*, *S. aureus*, and starvation.  
818 Columns represent independent biological replicates. \* indicates genes that were highly  
819 induced in wild type compared to *hlh-30/TFEB* mutants during infection, and thus were  
820 partially or completely HLH-30/TFEB-dependent. "Starv.", starvation.

821 **(D)** RT-qPCR of *fmo-2/FMO5* transcript in wild type, *hlh-30/TFEB* loss of function  
822 mutants, and *hlh-30(-)*; *Phlh-30::hlh-30::gfp* (complemented) animals fed nonpathogenic  
823 *E. coli* or infected with *S. aureus* (4 h). Data are normalized to wild type fed  
824 nonpathogenic *E. coli*, means  $\pm$  SEM (3 - 4 independent biological replicates). \*\*\* P <  
825 0.001, ns = not significant, one-way ANOVA followed by Sidak's test for multiple  
826 comparisons.

827

828 **Figure 3. Infection induces *fmo-2/FMO5* via NHR-49/PPAR- $\alpha$ .**

829 **(A-F)** Epifluorescence micrographs of animals carrying *Pfmo-2::nls::gfp* in wild type (**A**,  
830 **B**), *hlh-30/TFEB* (**C**, **D**), and *nhr-49/PPARA* mutant backgrounds (**E**, **F**) after feeding on  
831 *E. coli* OP50 or infection with *S. aureus* SH1000 (4 h). Scale bar = 1,000  $\mu\text{m}$ .

832 **(C)** Relative expression of *fmo-2/FMO5* transcript (RT-qPCR  $-\Delta\text{Ct}$ ) in wild type, *nhr-*  
833 *49/PPARA* loss of function mutants, and *nhr-49(-)*; *Pnhr-49::nhr-49* (complemented)  
834 animals fed nonpathogenic *E. coli* OP50 or infected with *S. aureus* SH1000 (4 h). Data



835 are normalized to wild type on *E. coli*, means  $\pm$  SEM (3 - 4 independent biological  
836 replicates). \*\*\*  $P < 0.001$ , ns = not significant, one-way ANOVA followed by Sidak's test  
837 for multiple comparisons.

838

839 **Figure 4. NHR-49/PPAR- $\alpha$  is required for host defense against infection.**

840 **(A)** Survival of wild type, *nhr-49/PPARA* loss of function, and *nhr-49(-); Pnhr-49::nhr-49*  
841 (complemented) animals infected with *S. aureus* SH1000. Data are representative of 2  
842 independent replicates. \*\*\*\*  $P < 0.0001$  (Log-Rank test).

843 **(B)** Lifespan on nonpathogenic *E. coli* OP50 of wild type, *nhr-49/PPARA* loss of  
844 function, and *nhr-49(-); Pnhr-49::nhr-49* animals. Data are representative of 2  
845 independent replicates. \*\*\*\*  $P < 0.0001$  (Log-Rank test).

846 **(C)** Survival of wild type and two *nhr-49/PPARA* gain of function mutants (gf1 = et7 and  
847 gf2 = et8) infected with *S. aureus* SH1000. Data are representative of 2 independent  
848 replicates. \*\*\*\*  $P < 0.0001$  (Log-Rank test).

849 **(D)** Lifespan of wild type and *nhr-49/PPARA* gain of function mutants on *E. coli* OP50.  
850 Data are representative of 3 independent replicates. \*\*\*\*  $P < 0.0001$  (Log-Rank test).

851 **(E)** Relative expression of *fmo-2/FMO5* transcript (RT-qPCR  $-\Delta$ Ct) in wild type and *nhr-*  
852 *49/PPARA* gain of function mutants fed nonpathogenic *E. coli* OP50 or infected with *S.*  
853 *aureus* SH1000 (4 h). Data are normalized to wild type on *E. coli*, means  $\pm$  SEM (2 - 5  
854 independent biological replicates). \*  $P < 0.05$ , \*\*  $P < 0.01$ , unpaired two-sample two-  
855 tailed *t*-test.

856 **(F-I)** Epifluorescence micrographs of *Pfmo-2::nls::gfp* in wild type **(F-G)** and *nhr-49(gf2)*  
857 mutants **(H-I)** fed nonpathogenic *E. coli* OP50 or infected with *S. aureus* SH1000 (4 h).  
858 Scale bar = 1,000  $\mu$ m.

859

## 860 **Figure 5. NHR-49/PPAR- $\alpha$ functions in multiple tissues for host defense**

861 **(A, D, G, J)** Relative expression of *fmo-2/FMO5* transcript (RT-qPCR  $-\Delta$ Ct) in wild type,  
862 *nhr-49/PPARA* loss of function mutants, and tissue-specific *nhr-49/PPARA* rescue lines:  
863 *Pglp-19* for intestine, (*Pglp-19::nhr-49::gfp*), *Prgef-1* for nervous system (*Prgef-1::nhr-*  
864 *49::gfp*), *Pmyo-3* for body wall muscle (*Pmyo-3::nhr-49::gfp*), and *Pcol-12* for epidermis  
865 (*Pcol-12::nhr-49::gfp*); fed nonpathogenic *E. coli* OP50 or infected with *S. aureus*  
866 SH1000 (4 h). Data are normalized to wild type on *E. coli*, means  $\pm$  SEM (3 - 6  
867 independent biological replicates,). \*\*\*  $P < 0.001$ , ns = not significant, one-way ANOVA  
868 followed by Sidak's test for multiple comparisons.

869 **(B, E, H, K)** Survival of wild type, *nhr-49/PPARA* loss of function, and tissue-specific  
870 *nhr-49/PPARA* rescue lines infected with *S. aureus*. Data are representative of 2  
871 independent replicates. \*\*\*\*  $P < 0.0001$  (Log-Rank test). Comparisons are made between  
872 *nhr-49(-)* and the rescue lines.

873 **(C, F, I, L)** Lifespan of wild type, *nhr-49/PPARA* loss of function, and tissue-specific *nhr-*  
874 *49* rescue lines on nonpathogenic *E. coli*. Data are representative of 3 independent  
875 replicates. \*\*\*\*  $P < 0.0001$  (Log-Rank test). Comparisons are made between *nhr-49(-)*  
876 and the rescue lines.

877

878 **Figure 6. HLH-30/TFEB genetically functions downstream of NHR-49/PPAR- $\alpha$  for**  
879 **host defense.**

880 **(A)** Relative expression of *nhr-49/PPARA* transcript (RT-qPCR  $-\Delta\text{Ct}$ ) in wild type and  
881 *hlh-30/TFEB* loss of function mutants fed nonpathogenic *E. coli* OP50 or infected with *S.*  
882 *aureus* SH1000 (8 h). Data are normalized to wild type on *E. coli*, means  $\pm$  SEM (4  
883 independent biological replicates). \*\*  $P < 0.01$ , ns = not significant, one-way ANOVA  
884 followed by Sidak's test for multiple comparisons.

885 **(B)** Relative expression of *hlh-30/TFEB* transcript (RT-qPCR  $-\Delta\text{Ct}$ ) in wild type, *nhr-*  
886 *49/PPARA* loss of function, and *nhr-49/PPARA* gain of function (*gf2*) mutants fed  
887 nonpathogenic *E. coli* OP50 or infected with *S. aureus* SH1000 (8 h). Data are  
888 normalized to wild type on *E. coli*, means  $\pm$  SEM (3 - 4 independent biological  
889 replicates, indicated). \*\*\*  $P < 0.001$ , one-way ANOVA followed by Sidak's test for  
890 multiple comparisons.

891 **(C)** Survival of wild type, *hlh-30/TFEB* loss of function, *nhr-49(gf1)*, *nhr-49(gf2)*, *nhr-*  
892 *49(gf1)*; *hlh-30(-)*, and *nhr-49(gf2)*; *hlh-30(-)* animals infected with *S. aureus* SH1000.  
893 Data are representative of 2 independent replicates. \*\*\*\*  $P < 0.0001$  (Log-Rank test,  
894 compared to *hlh-30(-)* mutants).

895 **(D)** Lifespan of wild type, *hlh-30(-)*, *nhr-49(gf1)*, *nhr-49(gf2)*, *nhr-49(gf1)*; *hlh-30(-)*, and  
896 *nhr-49(gf2)*; *hlh-30(-)* animals on nonpathogenic *E. coli* OP50. Data are representative  
897 of 2 independent replicates. \*\*\*\*  $P < 0.0001$  (Log-Rank test, compared to *hlh-30(-)*  
898 mutants).

899 **(E)** Relative expression of *fmo-2/FMO5* transcript (RT-qPCR  $-\Delta\text{Ct}$ ) in wild type,

900 *hlh-30(-)*, *nhr-49(gf1)*, *nhr-49(gf1);hlh-30(-)*, *nhr-49(gf2)*, and *nhr-49(gf2);hlh-30(-)*  
901 animals fed nonpathogenic *E. coli* OP50 or infected with *S. aureus* SH1000 (4 h). Data  
902 are normalized to wild type on *E. coli*, means  $\pm$  SEM (3 - 4 independent biological  
903 replicates). \*  $P \leq 0.05$ , \*\*  $P < 0.01$ , \*\*\*  $P < 0.001$ , one-way ANOVA followed by Sidak's  
904 test for multiple comparisons.

905 **(F)** Schematic representation of *fmo-2/FMO5* regulation during infection with *S. aureus*.  
906 Human homologs of the *C. elegans* proteins are indicated in grey lettering.

907

908 **Figure 7. FMO-2/FMO5 is required for host survival of infection.**

909 **(A)** Survival of wild type and *fmo-2/FMO5* loss of function mutants infected with *S.*  
910 *aureus* SH1000. Data are representative of 5 independent replicates. \*\*\*\*  $P < 0.0001$   
911 (Log-Rank test).

912 **(B)** Lifespan of wild type and *fmo-2/FMO5* loss of function mutants fed nonpathogenic  
913 *E. coli* OP50. Data are representative of 3 independent replicates. ns = not significant  
914 (Log-Rank test).

915 **(C)** Survival of wild type and *fmo-2/FMO5* loss of function mutants infected with *P.*  
916 *aeruginosa* PA14. Data are representative of 2 independent replicates. ns = not  
917 significant (Log-Rank test).

918 **(D)** Survival of wild type and *fmo-2(FAD)*, *fmo-2(NADPH)*, and *fmo-2(FAD+NADPH)*  
919 mutants infected with *S. aureus* SH1000. Data are representative of 2 independent  
920 replicates. \*\*\*\*  $P < 0.0001$  (Log-Rank test).

921 **(E)** Lifespan of wild type and *fmo-2(FAD)*, *fmo-2(NADPH)*, and *fmo-2(FAD+NADPH)*  
922 mutants on *E. coli* OP50. Data are representative of 3 independent replicates. ns = not  
923 significant (Log-Rank test).

924 **(F)** RT-qPCR of *fmo-2/FMO5* transcript in wild type animals fed nonpathogenic *E. coli*,  
925 or infected with *S. aureus* SH1000 or *P. aeruginosa* PA14 for 4 h. Data are normalized  
926 to *E. coli*, means  $\pm$  SEM (4 independent biological replicates). \*\*\*  $P \leq 0.001$ , unpaired  
927 two-sample two-tailed *t*-test.

928 **(G-J)** Epifluorescence micrographs of animals expressing NLS-GFP driven by the  
929 endogenous *fmo-2/FMO5* promoter (*Pfmo-2::nls::gfp*) fed on *E. coli*, infected with *S.*  
930 *aureus* SH1000 or *P. aeruginosa* PA14, or starved (4 h). Scale bar = 1,000  $\mu$ m.

931

932 **Figure S1. Expression analysis of 13 most highly induced genes (related to**  
933 **Figures 1 and 2).**

934 **(A-B)** Relative transcript expression of top most highly induced 13 genes from RNA-  
935 seq, measured by RT-qPCR, in wild type and *hlh-30(-)* animals that were fed  
936 nonpathogenic *E. coli*, infected with *S. aureus*, or starved for 4 h. Data are normalized  
937 to Wild type + *E. coli* and represent mean  $\pm$  S.E.M. of 3 - 4 biological replicates. ns = not  
938 significant, \*  $P < 0.05$ , \*\*  $P < 0.01$ , \*\*\*  $P < 0.001$  (unpaired two-tailed *t* test).

939

940 **Figure S2. Expression analysis of HLH-30/TFEB-independent genes in *nhr-***  
941 **49/PPARA mutants (related to Figure 3)**

942 Relative transcript expression (RT-qPCR) of 5 genes in wild type and *nhr-49(-)* animals  
943 fed nonpathogenic *E. coli* or infected with *S. aureus* (4 h), normalized to wild type + *E.*

944 *coli*. Data are mean  $\pm$  SEM (four independent biological replicates). ns = not significant,  
945 \*  $P \leq 0.05$ ; \*\*  $P < 0.01$ ; \*\*\*  $P < 0.001$ , ns = not significant, one-way ANOVA followed by  
946 Sidak's test for multiple comparisons.

947

948 **Figure S3. NHR-49/PPAR- $\alpha$  is required for one-third of the infection-specific**  
949 **transcriptional signature.**

950 **(A-B)** Heat map of differentially expressed genes during starvation and infection in wild  
951 type (A) and *nhr-49(-)* (B) animals (RNA-seq,  $\text{Log}_2(\text{FC})$ ,  $P_{\text{Adj}} \leq 0.001$ ). Columns  
952 represent a biological replicate each.

953 **(C)** Venn diagram representing genes that are upregulated by 4 h *S. aureus* infection  
954 compared with 4 h starvation in wild type and *nhr-49(-)* animals. Shown are a few  
955 examples for reference.

956

957 **Figure S4. FMO-2/FMO5 is not required for the expression of a set of host defense**  
958 **genes (related to Figure 7).**

959 **(A-I)** Relative transcript expression (RT-qPCR) of 9 genes in wild type and *fmo-2(-)*  
960 animals fed nonpathogenic *E. coli* or infected with *S. aureus* (4 h), normalized to wild  
961 type + *E. coli*. Data are mean  $\pm$  SEM (two independent biological replicates). ns = not  
962 significant, \*  $P \leq 0.05$ ; \*\*  $P < 0.01$ ; \*\*\*  $P < 0.001$ , ns = not significant, one-way ANOVA  
963 followed by Sidak's test for multiple comparisons.

964

965 **Figure S5. Highly conserved amino acid sequences in FMO-2/FMO5 (related to**  
966 **Figure 7)**

967 **(A)** Domain architecture of *C. elegans* FMO-2. Source: InterPro  
968 (<https://www.ebi.ac.uk/interpro/protein/UniProt/G5EBJ9>). TM, transmembrane domain.  
969 **(B)** Amino acid sequence alignment of *C. elegans* FMO-2, *Homo sapiens* FMO5, *Mus*  
970 *musculus* FMO5, *Arabidopsis thaliana* FMO1, and *Saccharomyces cerevisiae* Fmo1p.  
971 *C. elegans* FMO-2 was used as reference. Protein sequence of up to 280 amino acids  
972 was used for alignment in each case. Regions of the proteins that include FAD and  
973 NADPH motifs (highlighted in boxes) were chosen to show conservation. Glycine (G)  
974 residues modified by CRISPR are indicated with asterisks (\*) at the bottom of the amino  
975 acids.

976

977 **Figure S6. FMO-2/FMO5 and NHR-49/PPAR- $\alpha$  function in the same genetic**  
978 **pathway (related to Figure 7).**

979 **(A)** Survival of wild type, *nhr-49(-)*, and *nhr-49(-);fmo-2(-)* animals infected with *S.*  
980 *aureus*. Data are representative of 2 independent replicates. ns = not significant (Log-  
981 Rank test).

982 **(B)** Lifespan of wild type, *nhr-49(-)*, and *nhr-49(-);fmo-2(-)* animals on nonpathogenic *E.*  
983 *coli*. Data are representative of 2 independent replicates. ns = not significant, \*\*  $P <$   
984 0.01 (Log-Rank test).

985

986 **Figure S7. Intestinal overexpression of FMO-2/FMO5 boosts host survival of *S.***  
987 ***aureus* infection (related to Figure 7).**

988 **(A)** Survival of wild type and intestinal overexpression (OE) line of *fmo-2/FMO5* infected  
989 with *S. aureus*. Data are representative of 2 independent replicates. \*\*\*\* P < 0.0001 (Log-  
990 Rank test). Int., intestinal.

991 **(B)** Lifespan of wild type and intestinal overexpression (OE) of *fmo-2/FMO5* on *E. coli*  
992 OP50. Data are representative of 2 independent replicates. \*\*\*\* P < 0.0001 (Log-Rank  
993 test).

994



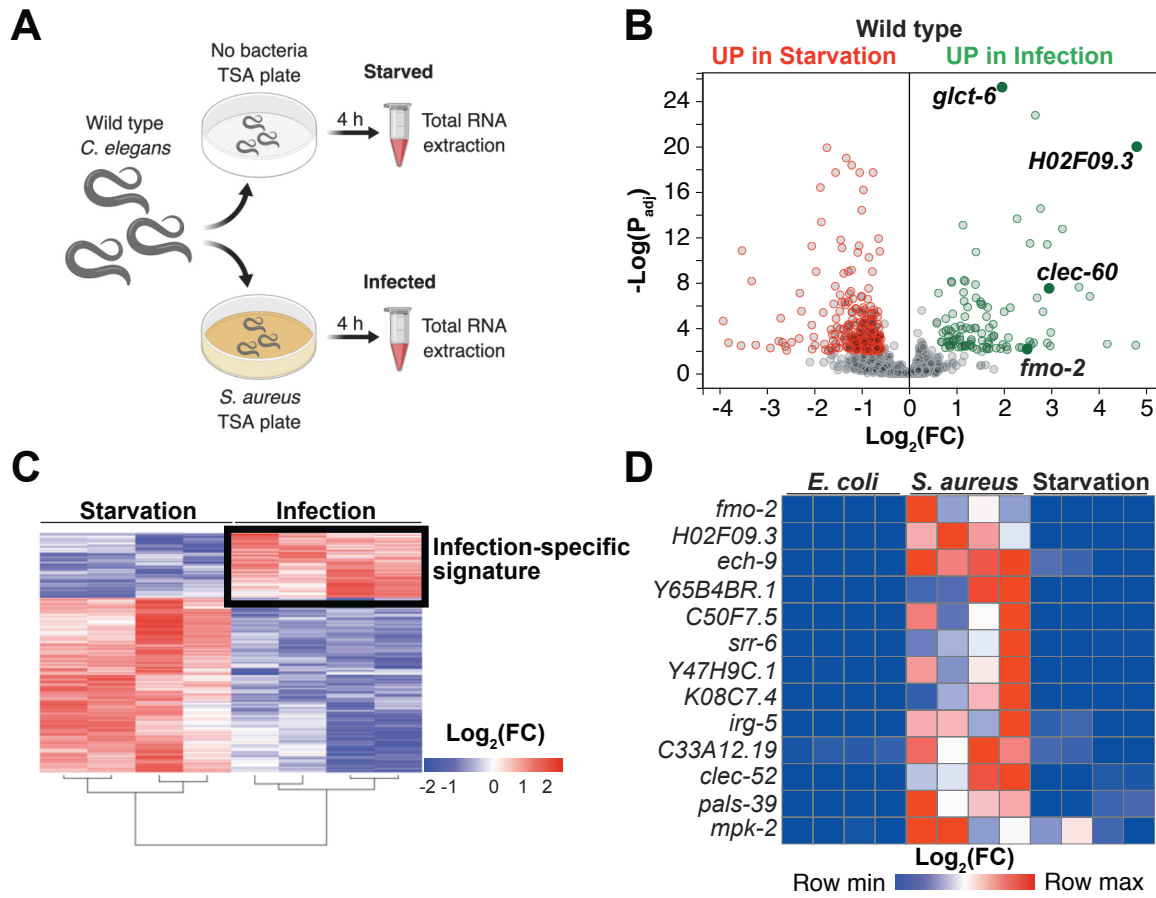

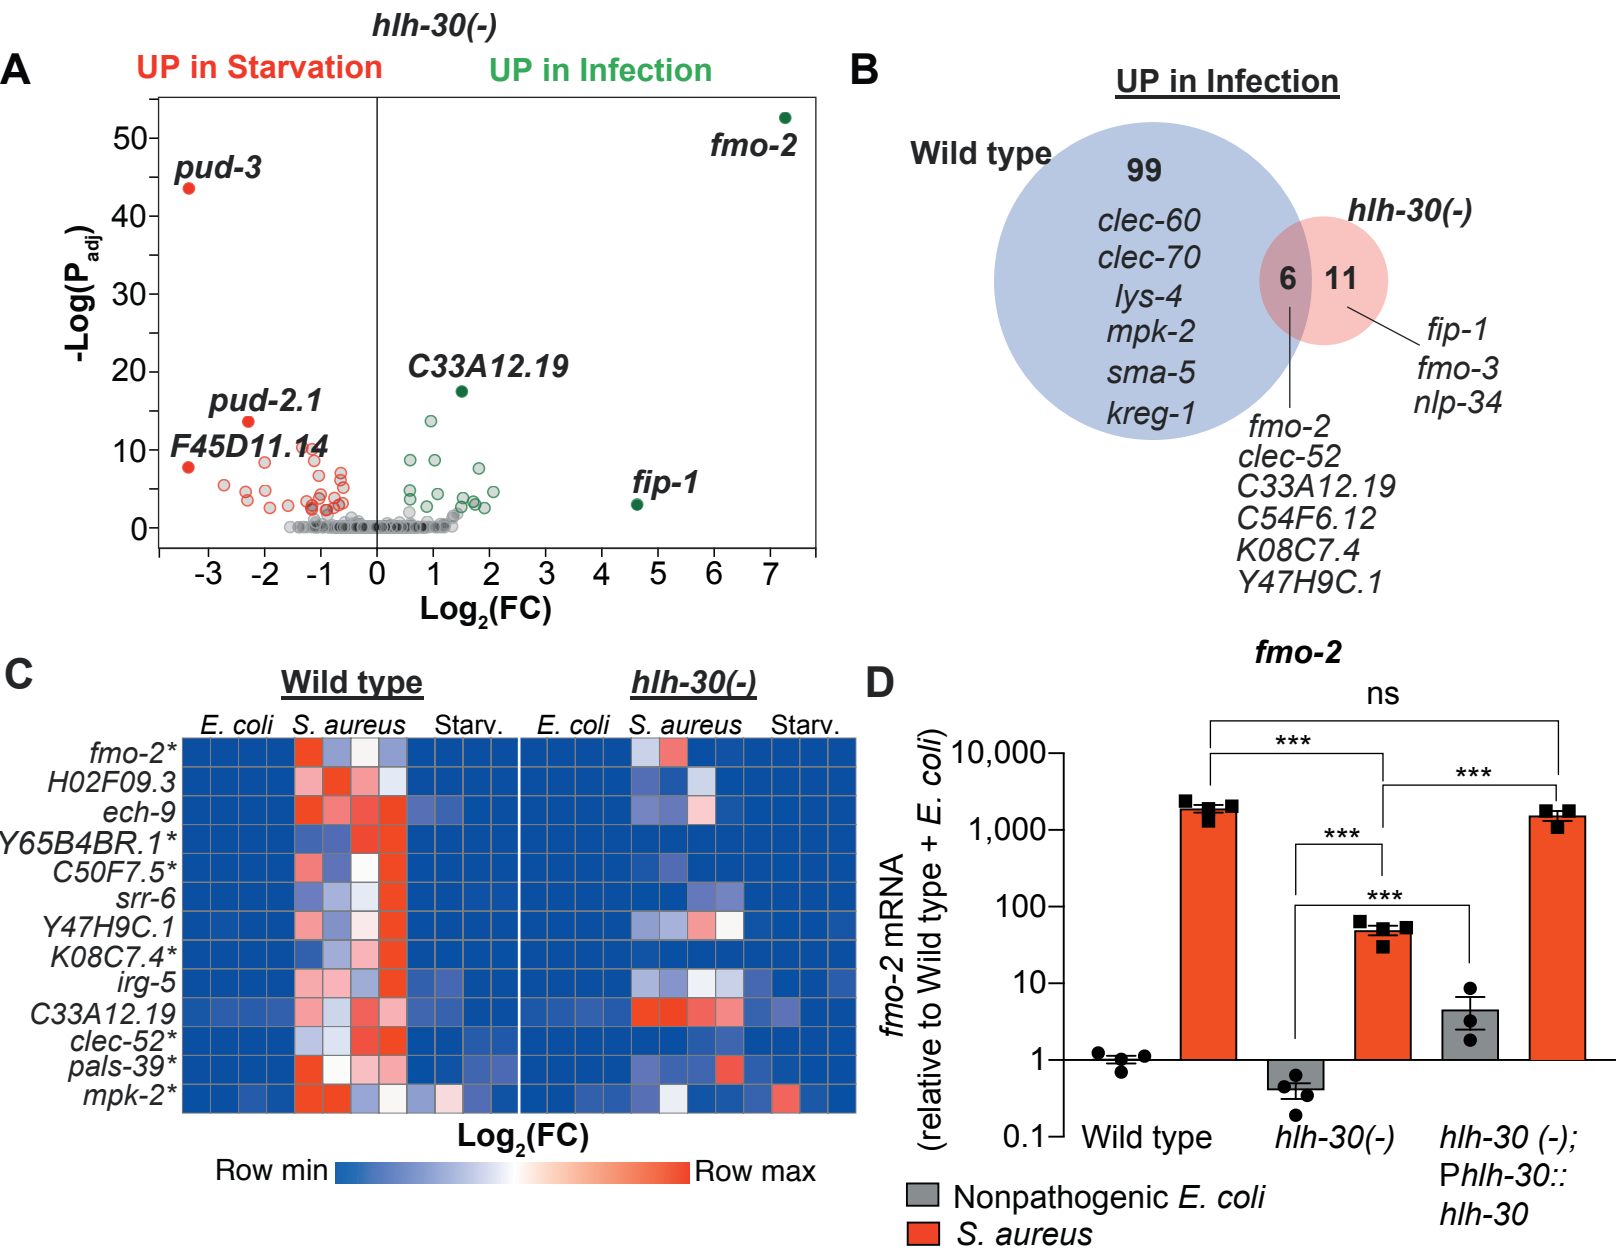

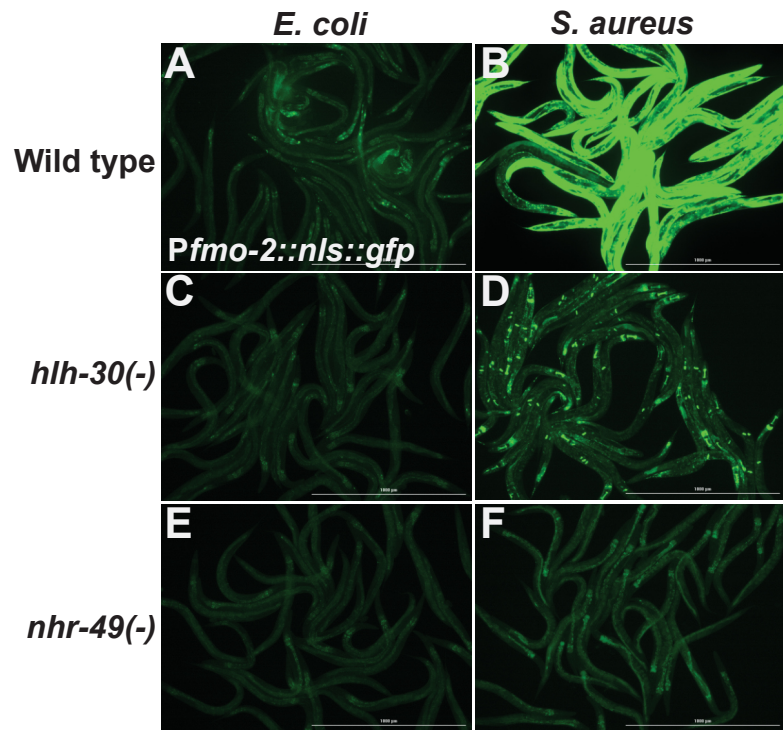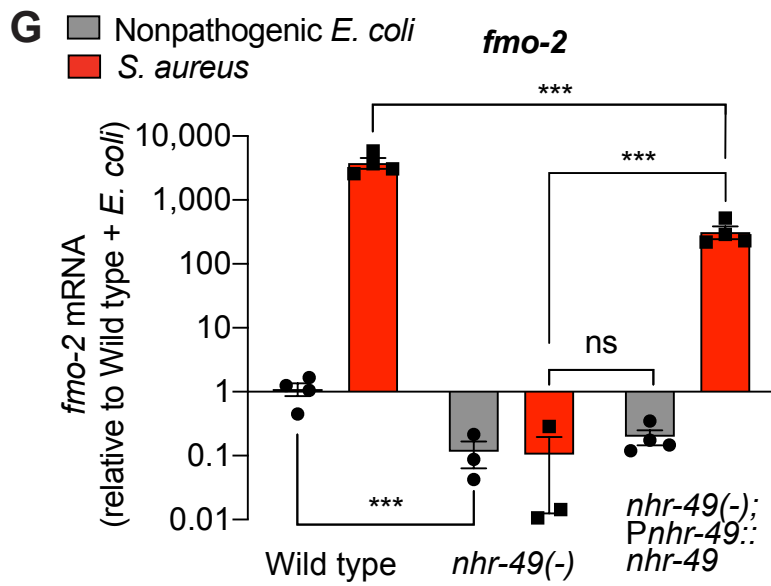

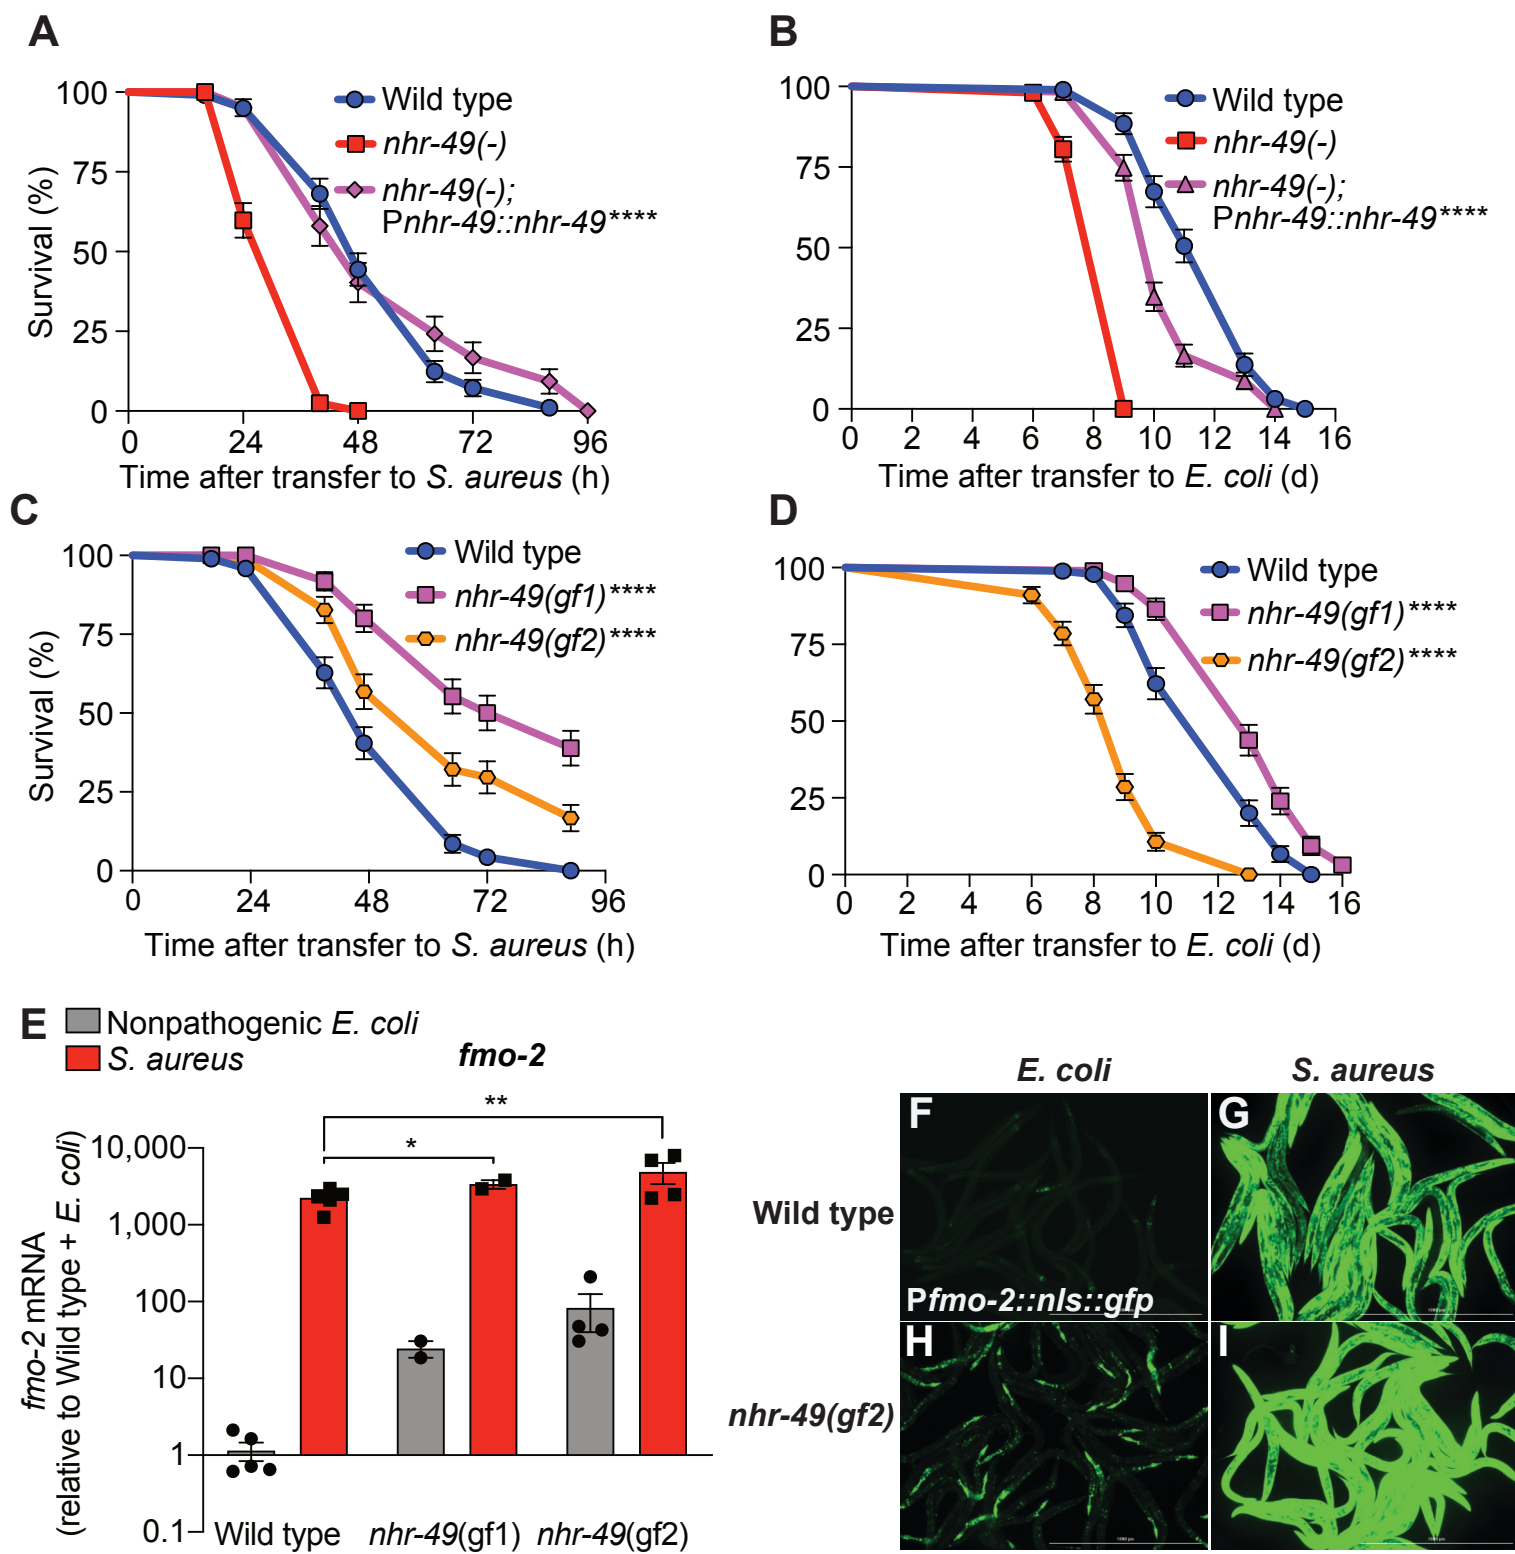

## Intestinal rescue

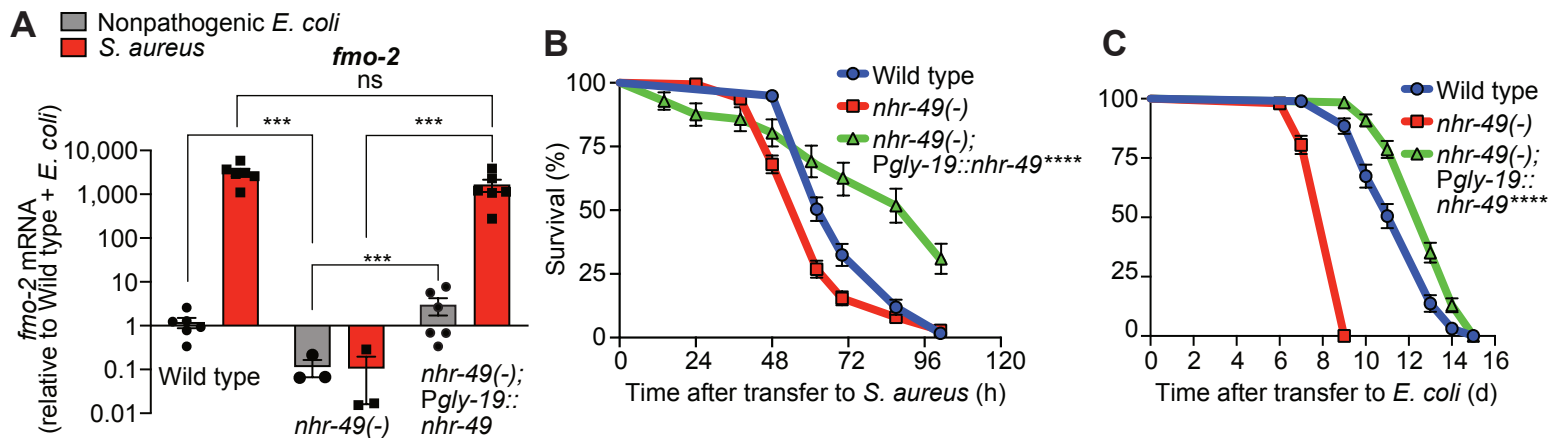

## Neuronal rescue

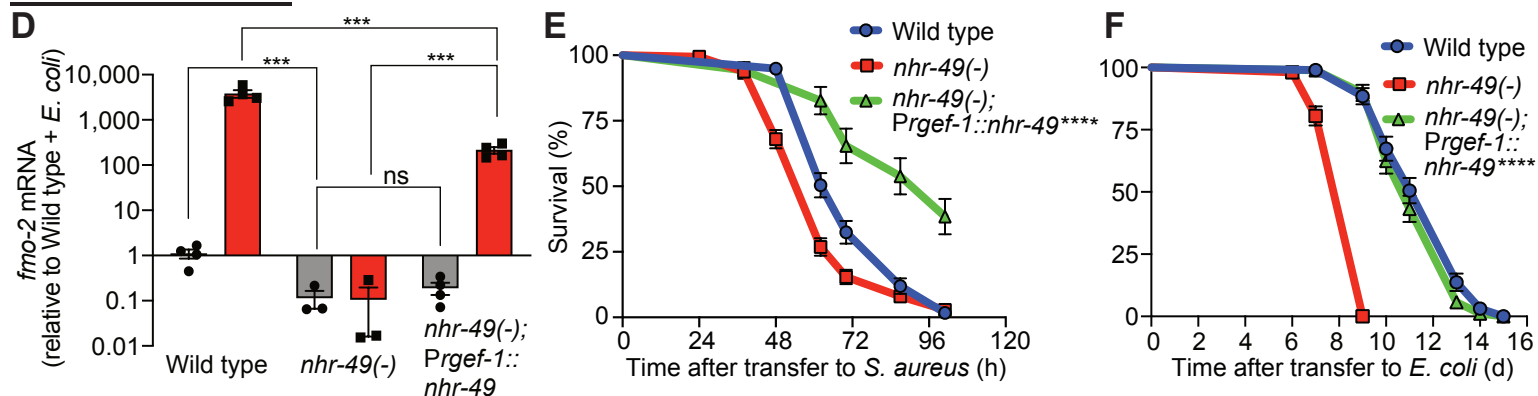

## Muscle rescue

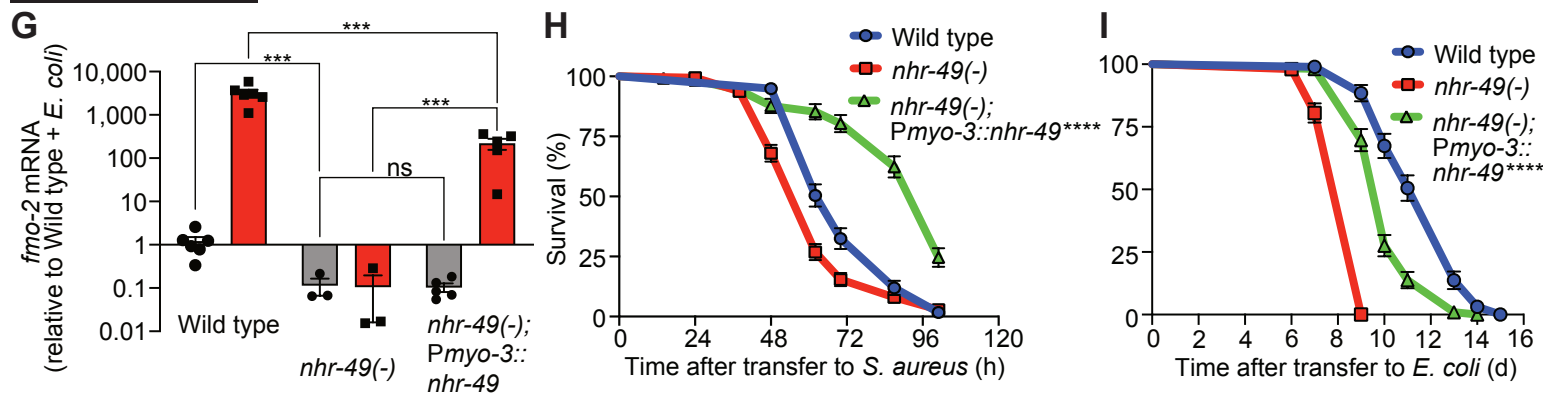

## Epidermal rescue

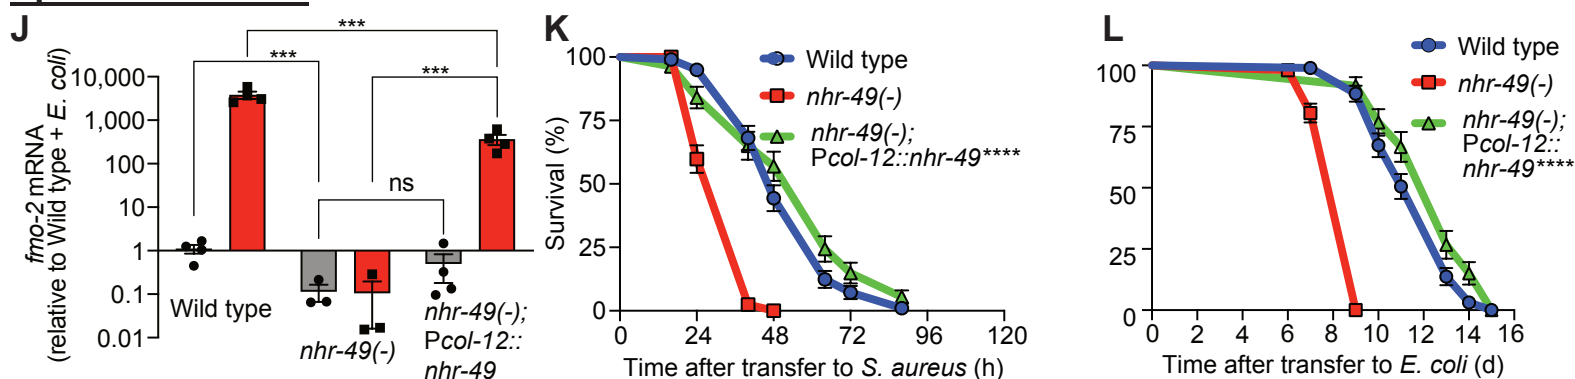

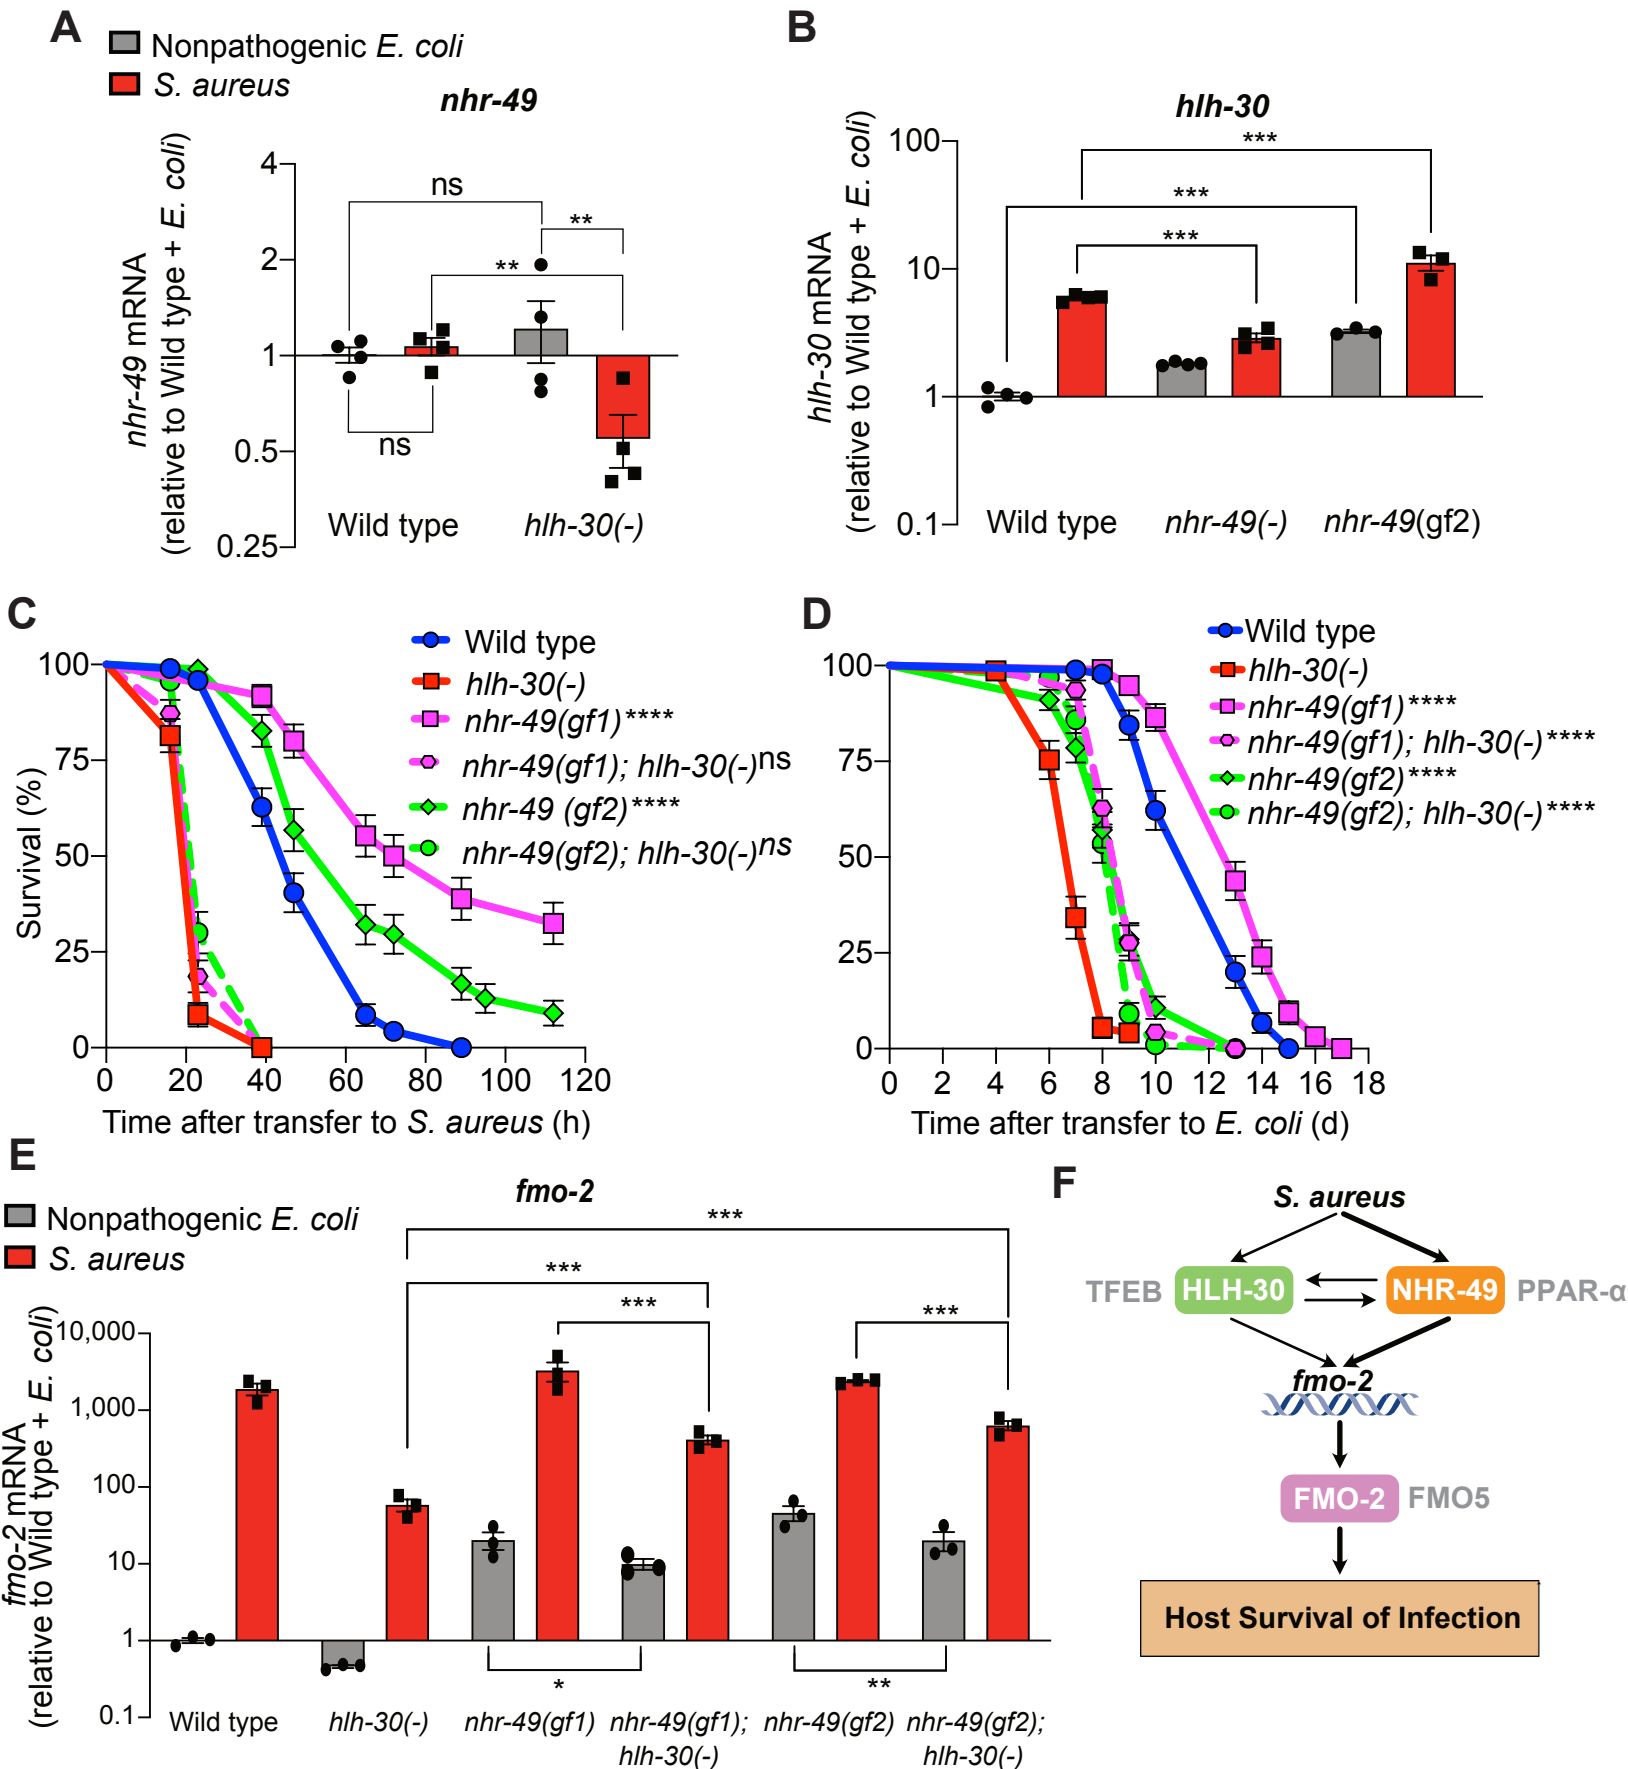

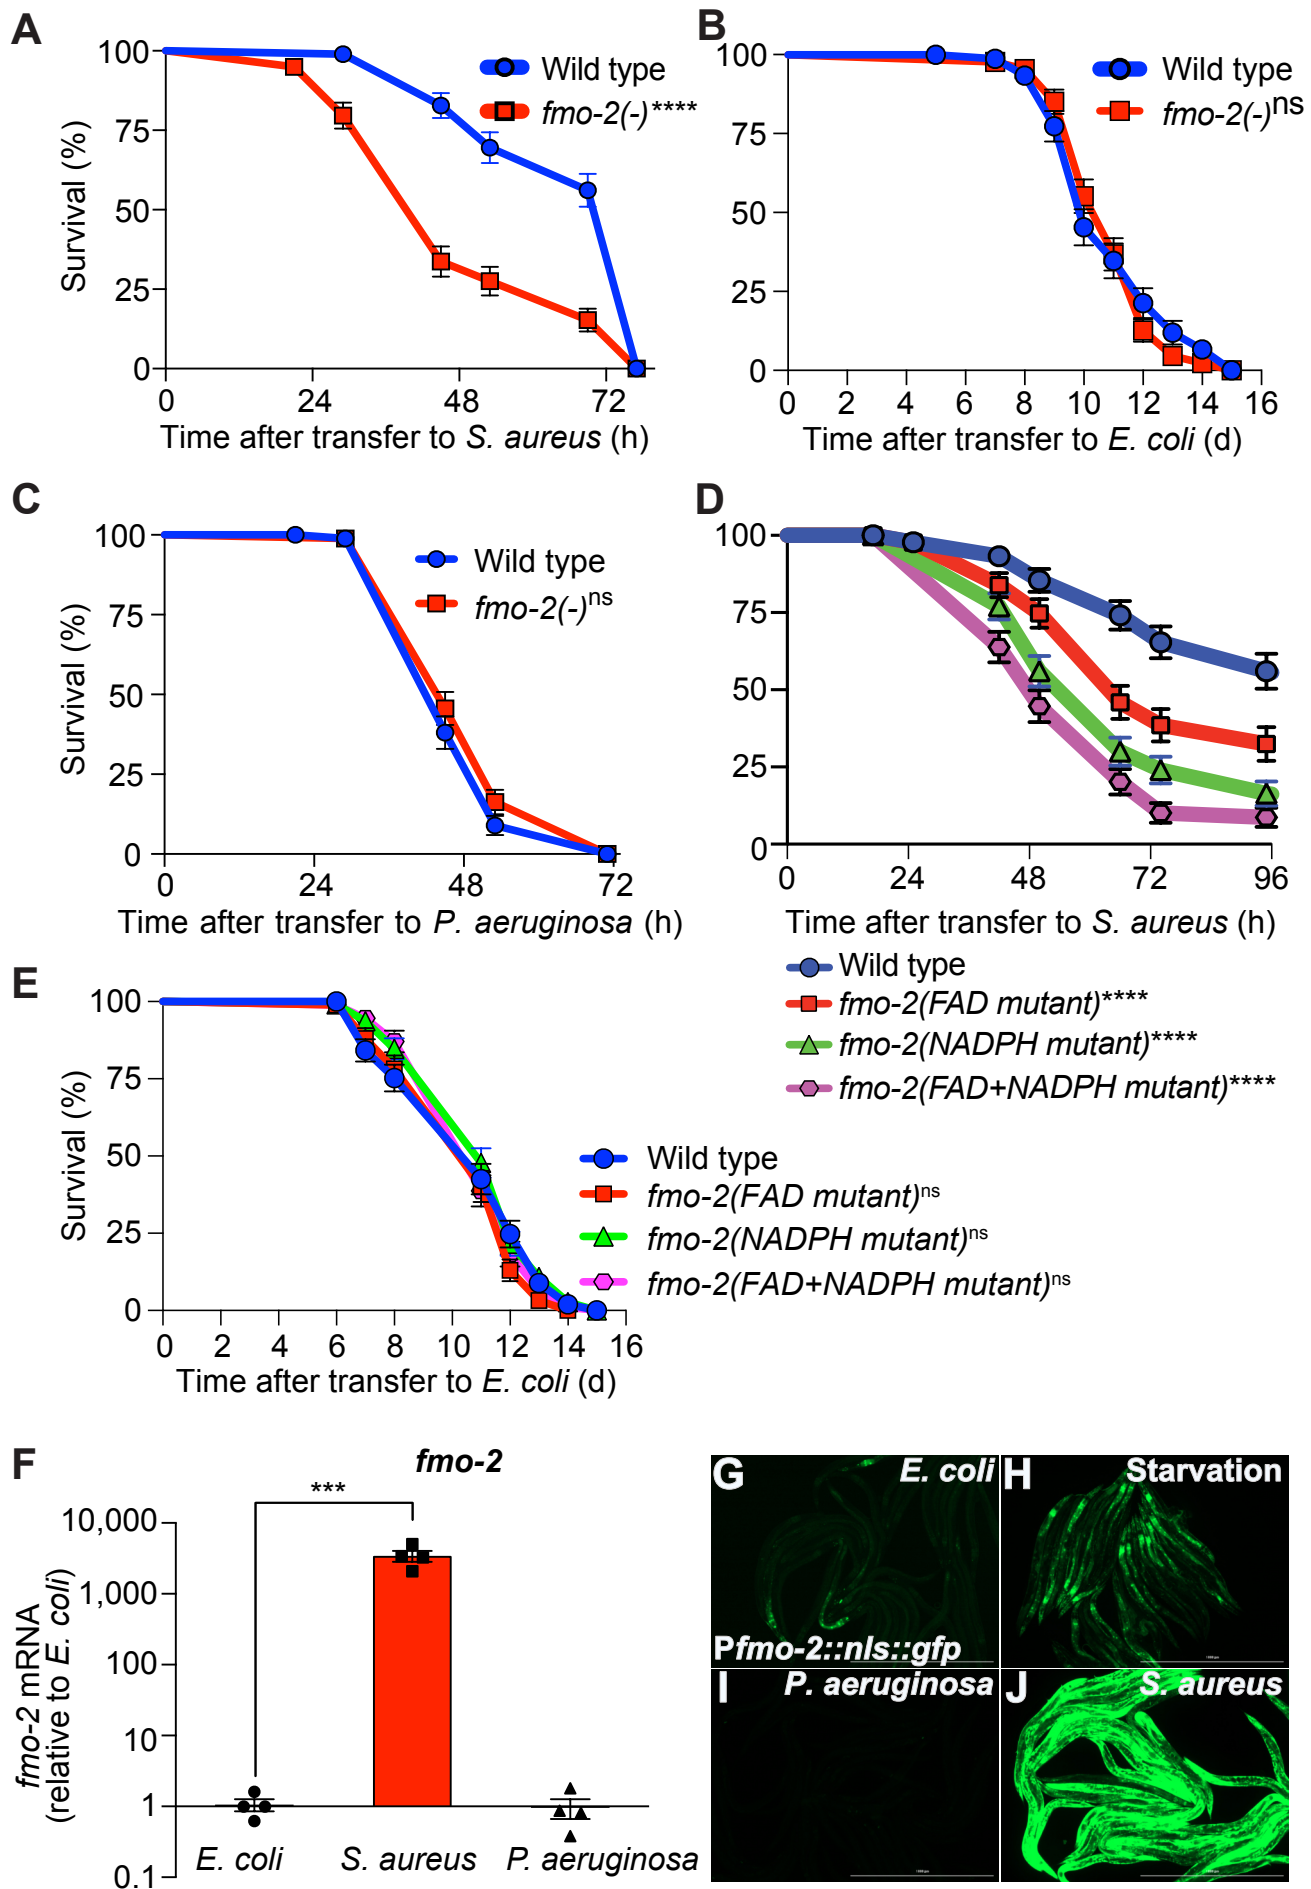

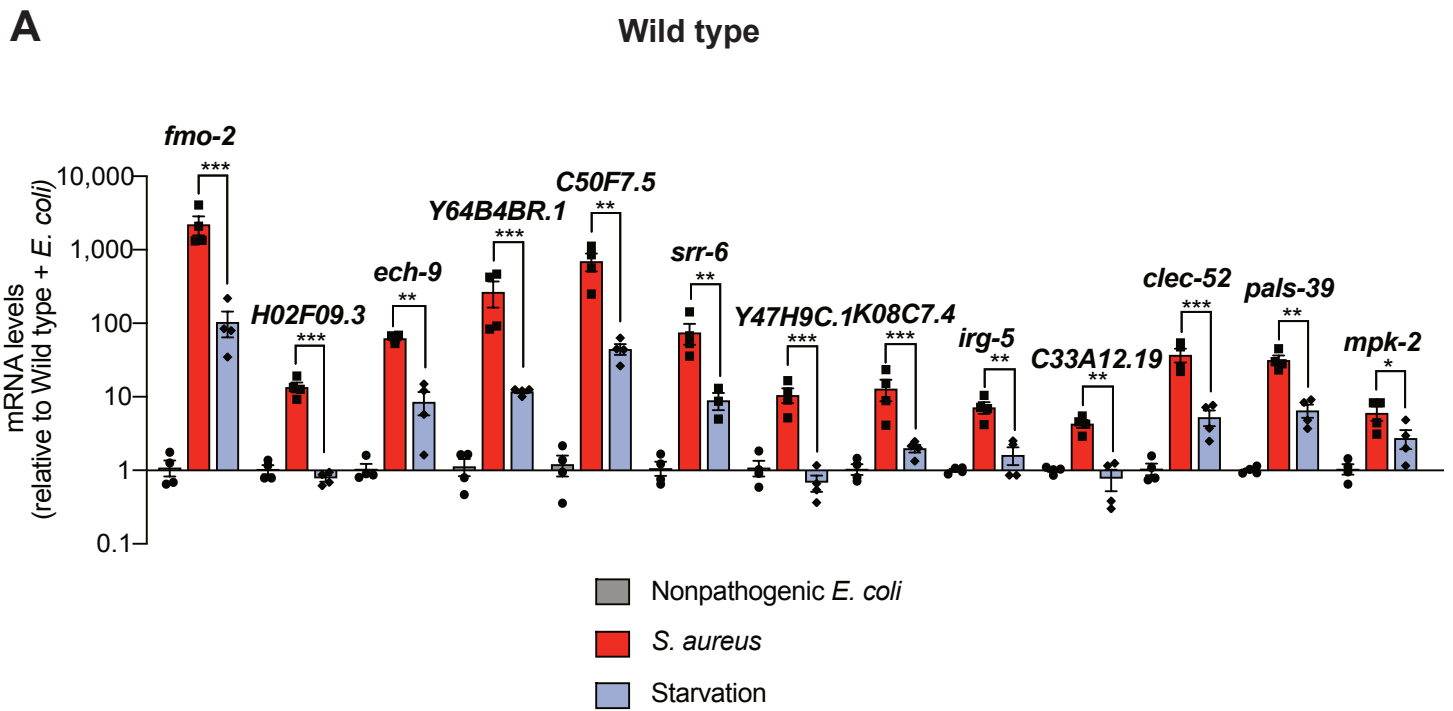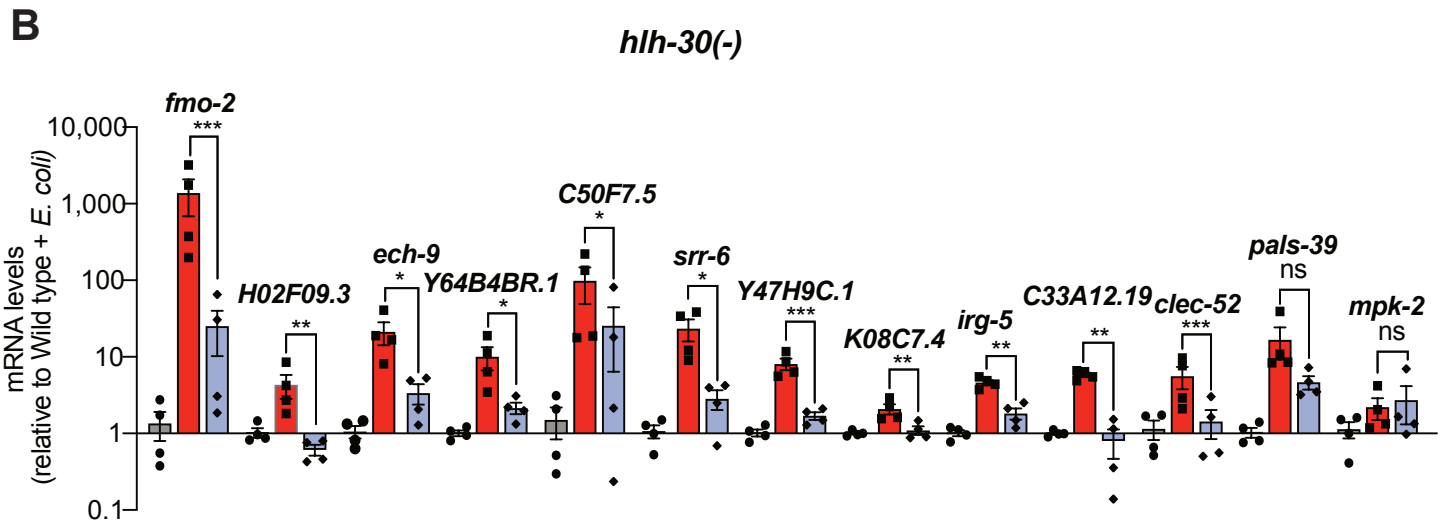



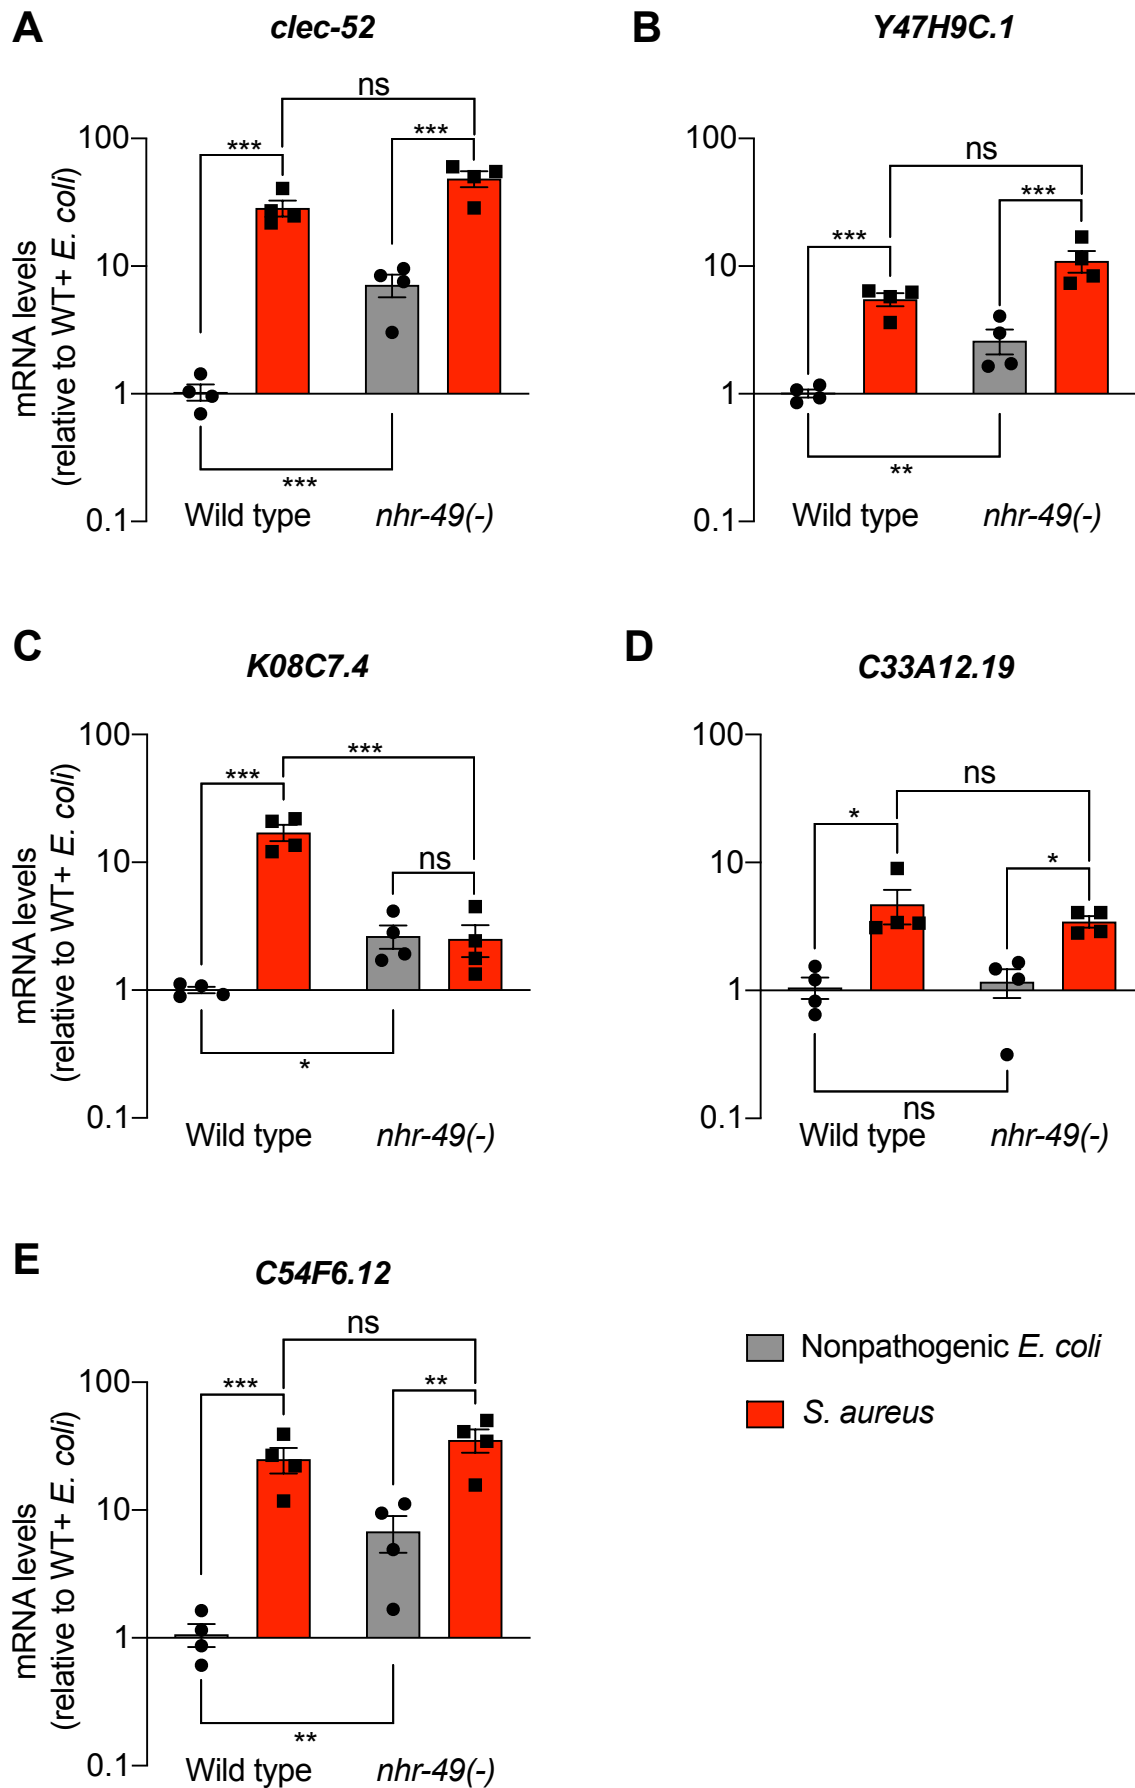

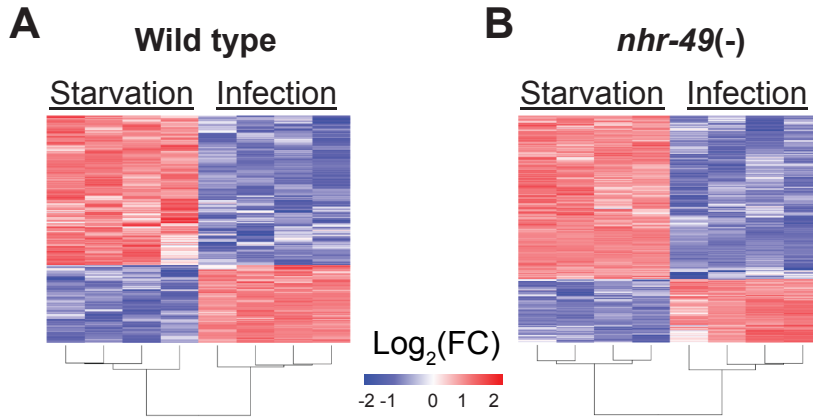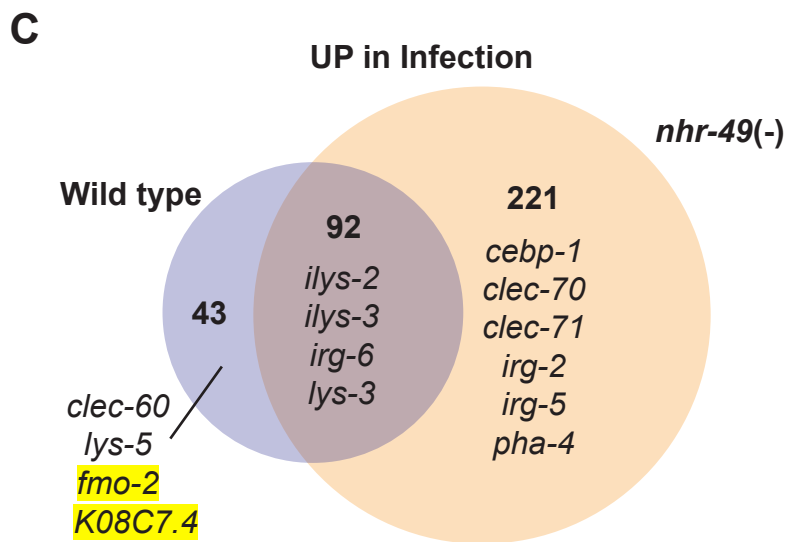

■ Nonpathogenic *E. coli* ■ *S. aureus*

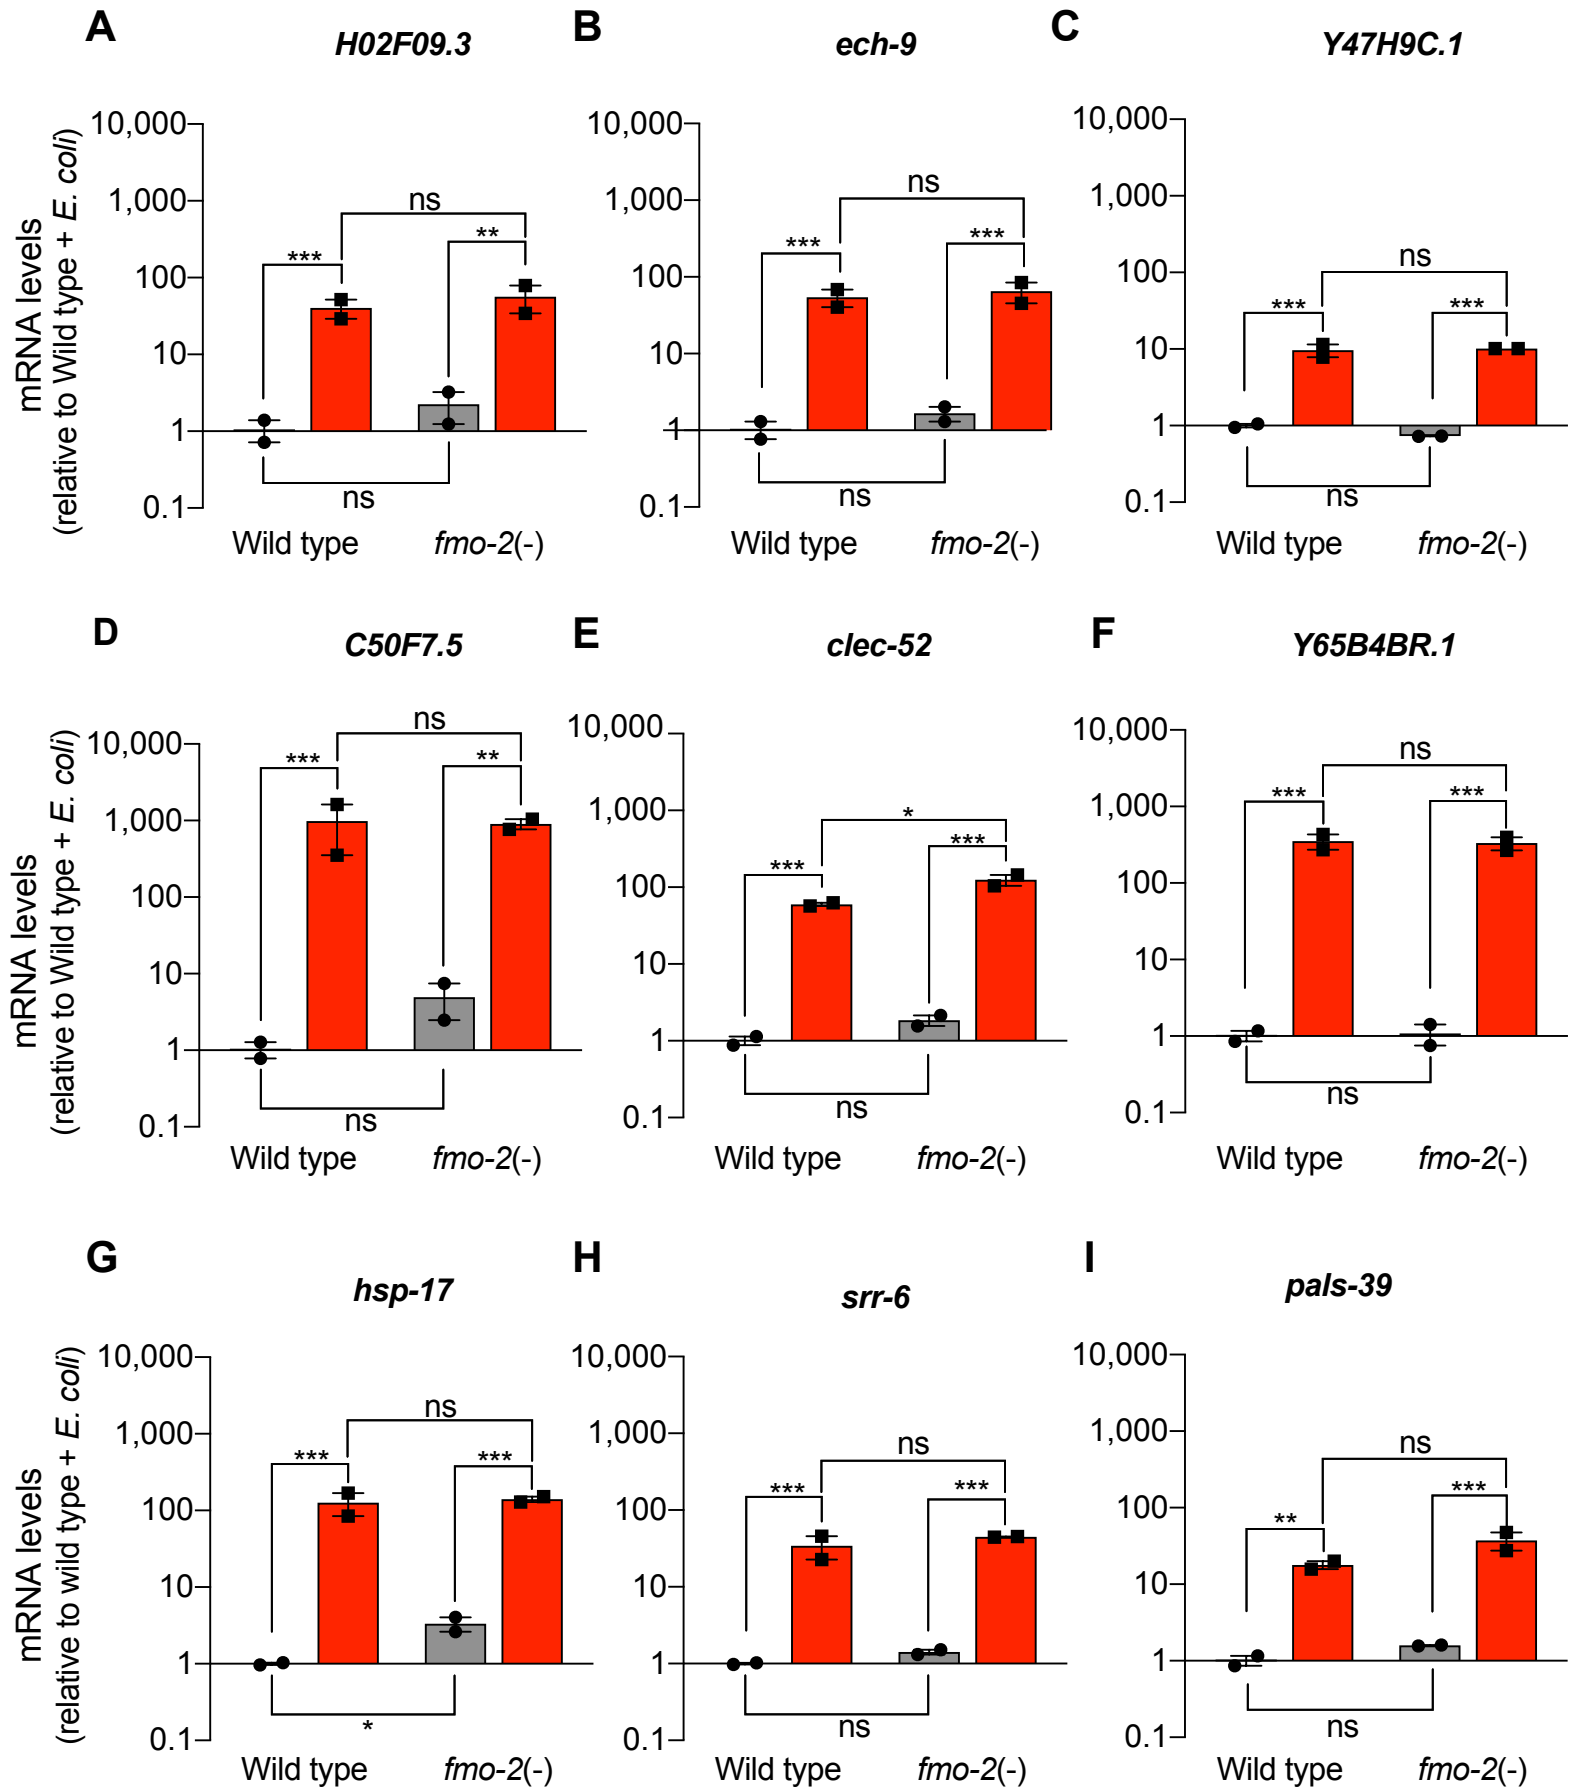

**A**

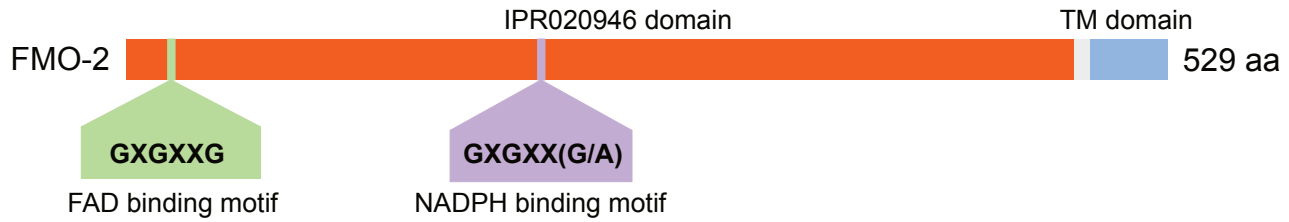

**B**

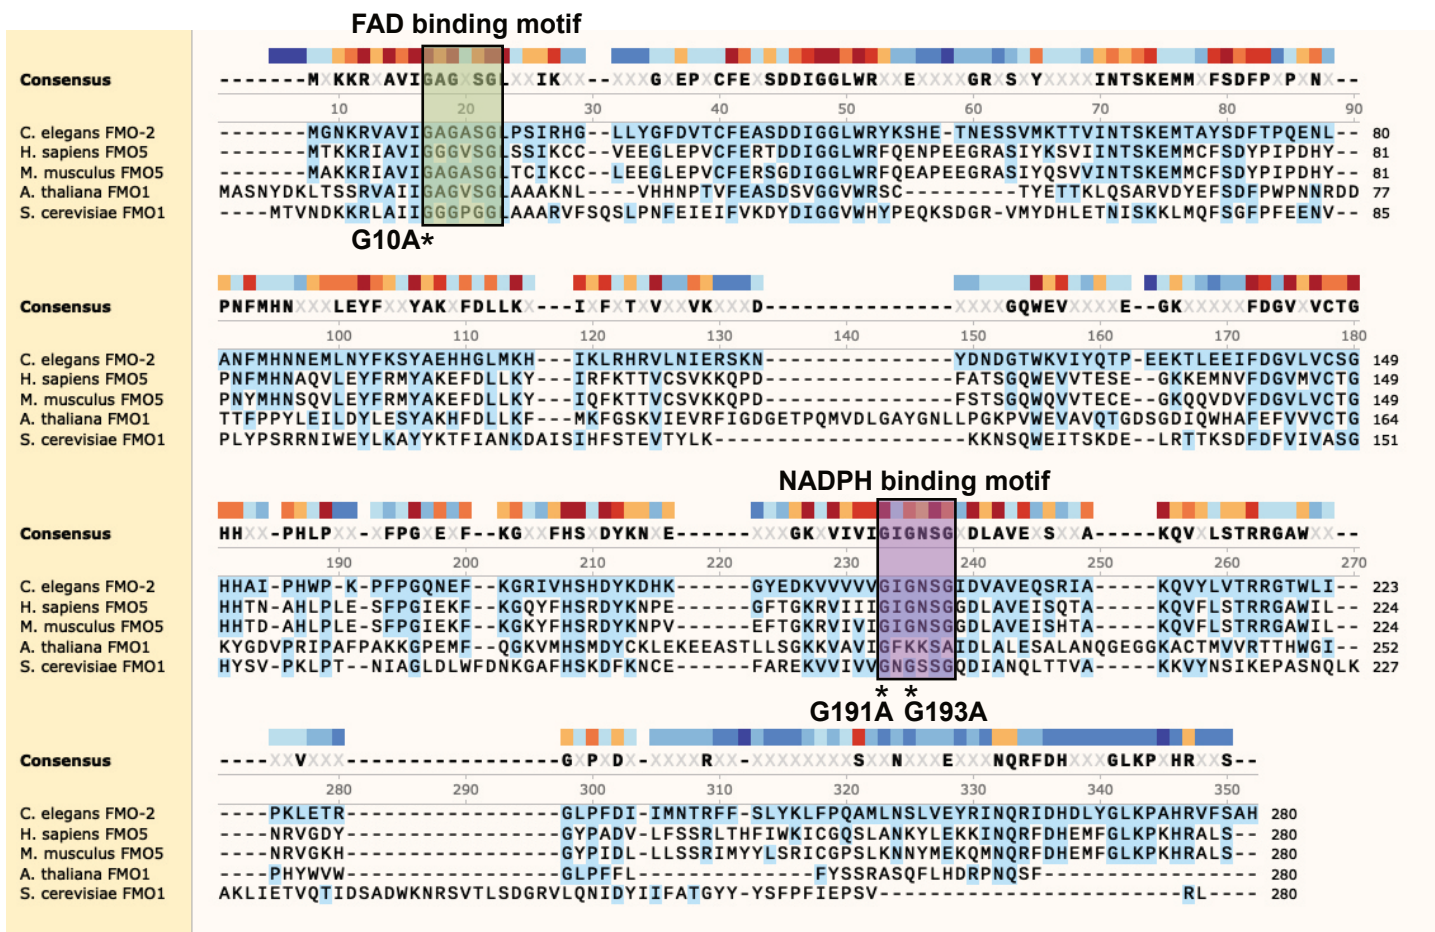

**A**

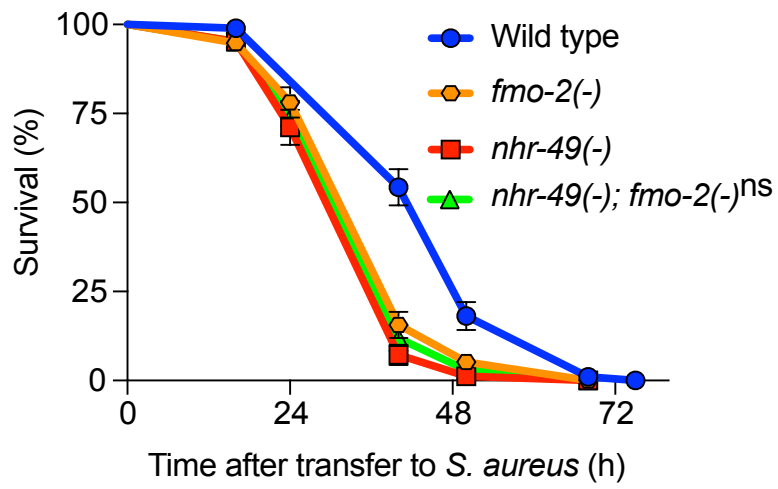

**B**

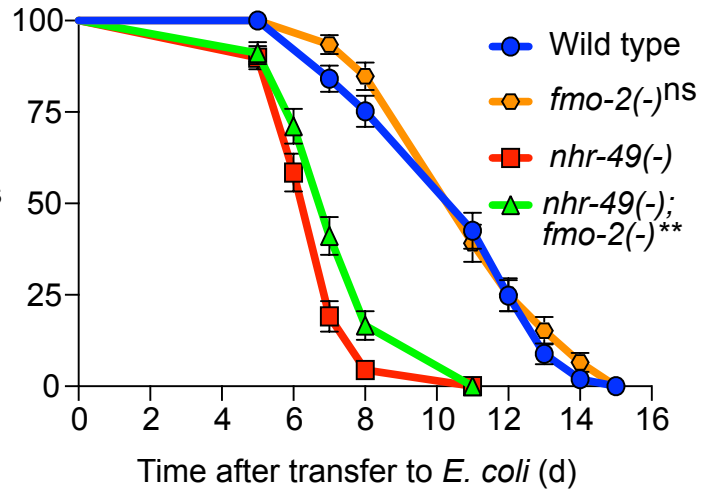

A

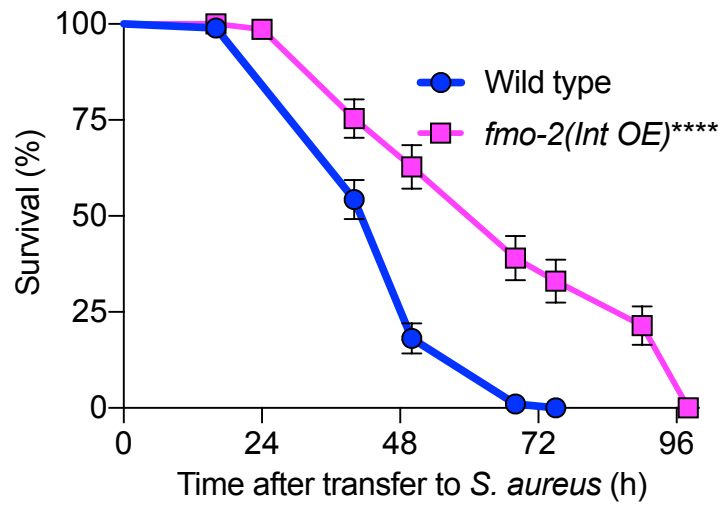

B

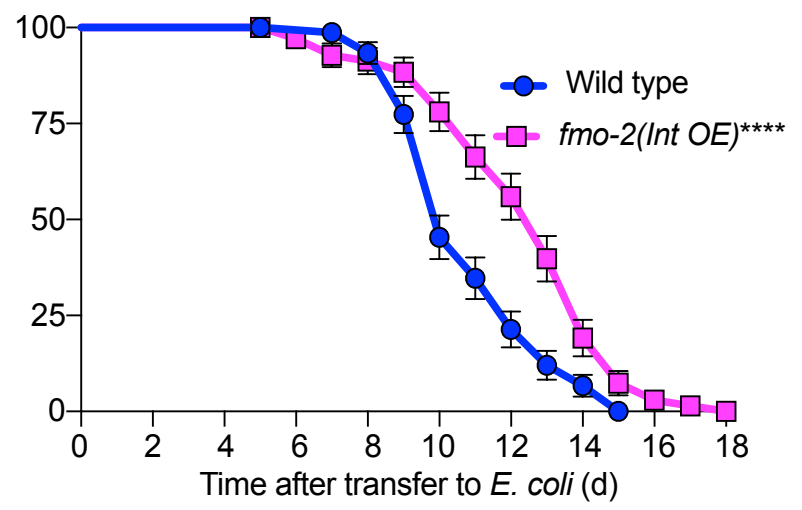

Source: https://www.biorxiv.org/content/biorxiv/early/2020/09/03/2020.09.03.282087.full.pdf
